# Supplementary material for: Genome–Wide Identification, Characterization and Expression Profile of F–box Protein Family Genes Shed Light on Lateral Branch Development in cultivated peanut (<em>Arachis hypogaea</em> L.)
Source: Preprints.org preprint supplement (doi:10.20944/preprints202401.1590.v1), 2024-01-22
Supplement: Supplementary file 1 [file Supplementary Materials.xlsx]

## Sheet: S1
Primer name	Primers sequence (5'-3')	Usage
AhFBX8-F	CTCCGACGATGGGTTGAGGC	qRT-PCR
AhFBX8-R	GATGTGTCTCCAGCTCCGGC	qRT-PCR
AhFBX31-F	ACCTGTGGCGCCATTTGGAA	qRT-PCR
AhFBX31-R	AGCTGCCAAGCCTTCAAGCA	qRT-PCR
AhFBX40-F	ACCTGTGGCGCCATTTGGAA	qRT-PCR
AhFBX40-R	AGCTGCCAAGCCTTCAAGCA	qRT-PCR
AhFBX45-F	TCGGGGTGGATTACGCAACG	qRT-PCR
AhFBX45-R	GGTGGGCTGCCAGAGGTTTT	qRT-PCR
AhFBX46-F	TCCCTTCGCTCTGCCTCTGA	qRT-PCR
AhFBX46-R	AATCAACGGCGAGGGGTGTC	qRT-PCR
AhFBX55-F	GCTGAGGTCAACGGCTTGGT	qRT-PCR
AhFBX55-R	CCCTTCGAATCCACACGCGA	qRT-PCR
AhFBX57-F	CTCCGACGATGGGTTGAGGC	qRT-PCR
AhFBX57-R	GATGTGTCTCCAGCTCCGGC	qRT-PCR
AhFBX90-F	GCTTCGGGGTGGATTACGCA	qRT-PCR
AhFBX90-R	GGTGGGCTGCCAGAGGTTTT	qRT-PCR
AhFBX91-F	TCCCTTCGCTCTGCCTCTGA	qRT-PCR
AhFBX91-R	AATCAACGGCGAGGGGTGTC	qRT-PCR
UBI1-F	TCTTGTCCTCCGTCTTAGGG	Reference gene
UBI1-R	AGCAAGGGTCCTTCCATCTT	Reference gene

## Sheet: S2
Gene ID	Gene Name	Chromosome physical position	No. aa	Molecular weight（kD）	pI	Instability index	Aliphatic index	Subcellular localization	Hydrophobicity
arahy.Tifrunner.gnm1.ann1.S8ICGN	AhFBX1	Arahy.01：105291055-105296016	456	49.14	9.27	39.7	87.12	Plasma Membrane	Hydrophilicity
arahy.Tifrunner.gnm1.ann1.6LM7DE	AhFBX2	Arahy.02：5426833-5429927	361	53.49	7.96	39.96	92.45	Plasma Membrane	Hydrophilicity
arahy.Tifrunner.gnm1.ann1.I0AFD1	AhFBX3	Arahy.02：94923344-94926313	495	49.38	8.49	40.58	90.33	Plasma Membrane	Hydrophilicity
arahy.Tifrunner.gnm1.ann1.FB190S	AhFBX4	Arahy.03：122940137-122941357	373	46.22	5.71	31.72	88.05	Plasma Membrane	Hydrophilicity
arahy.Tifrunner.gnm1.ann1.U37KZ8	AhFBX5	Arahy.03：139382415-139384530	345	51.87	5.82	47.55	97.67	Cytoplasmic	Hydrophilicity
arahy.Tifrunner.gnm1.ann1.2I2XLP	AhFBX6	Arahy.03：141833907-141836791	352	44.37	7.41	7.41	80.38	Chloroplast	Hydrophilicity
arahy.Tifrunner.gnm1.ann1.AC2G74	AhFBX7	Arahy.04：3790506-3791726	366	44.92	6.1	44.02	83.84	Plasma Membrane	Hydrophilicity
arahy.Tifrunner.gnm1.ann1.A26VA3	AhFBX8	Arahy.04：3250075-3252744	463	44.37	9.44	59.59	81.49	Nuclear	Hydrophilicity
arahy.Tifrunner.gnm1.ann1.8IRE12	AhFBX9	Arahy.04：116991880-116993912	400	41.41	8.52	52.53	115.82	Plasma Membrane	Hydrophilicity
arahy.Tifrunner.gnm1.ann1.I5L8FP	AhFBX10	Arahy.04：118959334-118961253	454	45.45	6.85	44.65	91.32	Plasma Membrane	Hydrophilicity
arahy.Tifrunner.gnm1.ann1.KD9PJ3	AhFBX11	Arahy.04：124723601-124725511	406	50.63	8.93	43.42	78.87	Nuclear	Hydrophilicity
arahy.Tifrunner.gnm1.ann1.3QCW2V	AhFBX12	Arahy.04：125830520-125834005	366	54.3	8.92	44.18	93.38	Plasma Membrane	Hydrophilicity
arahy.Tifrunner.gnm1.ann1.LFQ4L6	AhFBX13	Arahy.04：126370081-126372707	319	48.74	8.88	41.06	86.96	Nuclear	Hydrophilicity
arahy.Tifrunner.gnm1.ann1.X0G52T	AhFBX14	Arahy.04：126331292-126333863	386	49.86	9.43	43.29	88.53	Plasma Membrane	Hydrophilicity
arahy.Tifrunner.gnm1.ann1.8CD6MN	AhFBX15	Arahy.04：126153628-126155731	392	45.11	6.28	43.16	86.22	Cytoplasmic	Hydrophilicity
arahy.Tifrunner.gnm1.ann1.7LAG9G	AhFBX16	Arahy.04：126348724-126350809	220	55.43	8.57	36.16	83.16	Extracellular	Hydrophilicity
arahy.Tifrunner.gnm1.ann1.A0TG2R	AhFBX17	Arahy.04：126168974-126172112	399	56.85	9.14	50.57	85.82	Plasma Membrane	Hydrophilicity
arahy.Tifrunner.gnm1.ann1.SLE2S5	AhFBX18	Arahy.04：126461799-126463007	365	45.97	9.16	36.77	88.03	Extracellular	Hydrophilicity
arahy.Tifrunner.gnm1.ann1.AE1TV9	AhFBX19	Arahy.04：126240955-126245492	350	82.52	8.76	42.25	88.09	Plasma Membrane	Hydrophilicity
arahy.Tifrunner.gnm1.ann1.1H6I1Z	AhFBX20	Arahy.04：126382318-126384002	183	40.83	6.78	37.26	98.3	Plasma Membrane	Hydrophilicity
arahy.Tifrunner.gnm1.ann1.09C040	AhFBX21	Arahy.04：126308653-126310678	309	44.25	5.46	39.3	97.97	Plasma Membrane	Hydrophilicity
arahy.Tifrunner.gnm1.ann1.R40TSQ	AhFBX22	Arahy.04：126344634-126346218	345	43.44	6.87	28.91	99.53	Plasma Membrane	Hydrophilicity
arahy.Tifrunner.gnm1.ann1.MMWN9B	AhFBX23	Arahy.04：126327151-126329676	356	51.06	8.61	41	89.57	Plasma Membrane	Hydrophilicity
arahy.Tifrunner.gnm1.ann1.EFML97	AhFBX24	Arahy.04：126269923-126275534	393	85.32	8.56	42.67	90.54	Plasma Membrane	Hydrophilicity
arahy.Tifrunner.gnm1.ann1.AXI81X	AhFBX25	Arahy.05：36741742-36744166	385	53.83	5.7	58.27	89.07	Nuclear Nuclear	Hydrophilicity
arahy.Tifrunner.gnm1.ann1.DNVT9B	AhFBX26	Arahy.05：115120458-115125778	396	59.98	8.48	44.94	99.68	Nuclear Nuclear	Hydrophilicity
arahy.Tifrunner.gnm1.ann1.49J1TU	AhFBX27	Arahy.06：2866117-2867334	410	45.74	5.64	42.13	88.05	Plasma Membrane	Hydrophilicity
arahy.Tifrunner.gnm1.ann1.XNP3RF	AhFBX28	Arahy.06：5458419-5459736	474	32.68	5.86	49.84	85.35	Extracellular	Hydrophilicity
arahy.Tifrunner.gnm1.ann1.U0A6F2	AhFBX29	Arahy.06：10233632-10240409	456	37.45	8.86	46.8	92.32	Plasma Membrane	Hydrophilicity
arahy.Tifrunner.gnm1.ann1.4JU4D9	AhFBX30	Arahy.06：110581914-110583535	404	47	5.26	47.12	82.29	Plasma Membrane	Hydrophilicity
arahy.Tifrunner.gnm1.ann1.W8H4W4	AhFBX31	Arahy.08：10392801-10397328	308	37.76	9.41	47.4	81.64	Chloroplast	Hydrophilicity
arahy.Tifrunner.gnm1.ann1.IAZ4XM	AhFBX32	Arahy.08：12157843-12160584	353	52.55	6.05	50.03	78.12	Chloroplast	Hydrophilicity
arahy.Tifrunner.gnm1.ann1.26WN5G	AhFBX33	Arahy.08：14972461-14974910	343	44.06	9.38	57.98	111.67	Plasma Membrane	Hydrophilicity
arahy.Tifrunner.gnm1.ann1.58PES0	AhFBX34	Arahy.09：538801-540054	439	47.8	5.09	44.43	75.23	Plasma Membrane	Hydrophilicity
arahy.Tifrunner.gnm1.ann1.GL93TL	AhFBX35	Arahy.09：3169602-3175103	401	52.39	5.45	35.66	111.19	Plasma Membrane	Hydrophilicity
arahy.Tifrunner.gnm1.ann1.TWR7CT	AhFBX36	Arahy.09：3204984-3207717	474	50.6	5.8	34.43	103.87	Plasma Membrane	Hydrophilicity
arahy.Tifrunner.gnm1.ann1.F751SF	AhFBX37	Arahy.09：3377489-3380963	278	45.92	5.45	53.26	109.83	Plasma Membrane	Hydrophilicity
arahy.Tifrunner.gnm1.ann1.9JS9NA	AhFBX38	Arahy.09：3366513-3371397	421	53.34	4.88	50.61	108.99	Plasma Membrane	Hydrophilicity
arahy.Tifrunner.gnm1.ann1.6V8N23	AhFBX39	Arahy.09：3224411-3251433	329	125.54	8.15	49.88	103.82	Plasma Membrane	Hydrophilicity
arahy.Tifrunner.gnm1.ann1.H861J2	AhFBX40	Arahy.09：3290089-3293908	400	64.26	6.61	51.91	99.93	Nuclear	Hydrophilicity
arahy.Tifrunner.gnm1.ann1.U952AB	AhFBX41	Arahy.09：3256719-3258385	390	46.93	7.29	45	100.82	Nuclear	Hydrophilicity
arahy.Tifrunner.gnm1.ann1.TE0DUK	AhFBX42	Arahy.09：3282051-3283572	446	38.85	7.51	47.75	110.09	Nuclear	Hydrophilicity
arahy.Tifrunner.gnm1.ann1.KT489S	AhFBX43	Arahy.09：3140928-3142634	250	43.95	5.78	46.36	103.29	Nuclear	Hydrophilicity
arahy.Tifrunner.gnm1.ann1.SML81V	AhFBX44	Arahy.09：4512244-4513480	417	38.38	9.78	39.95	107.28	Mitochondrial	Hydrophilicity
arahy.Tifrunner.gnm1.ann1.WX0X0K	AhFBX45	Arahy.09：6575256-6579883	881	50.41	6.64	37.19	89.37	Plasma Membrane	Hydrophilicity
arahy.Tifrunner.gnm1.ann1.693WQ9	AhFBX46	Arahy.09：29457582-29459595	504	24.1	5.24	63.46	76.79	Chloroplast	Hydrophilicity
arahy.Tifrunner.gnm1.ann1.ELS2X1	AhFBX47	Arahy.09：106599075-106603494	628	55.02	5.59	50.91	97.26	Nuclear	Hydrophilicity
arahy.Tifrunner.gnm1.ann1.U3PQ4N	AhFBX48	Arahy.09：111300760-111303287	475	56.79	5.19	46.03	98	Nuclear	Hydrophilicity
arahy.Tifrunner.gnm1.ann1.3J0CNY	AhFBX49	Arahy.09：111294795-111299788	370	88.37	5.46	46.84	100.49	Nuclear	Hydrophilicity
arahy.Tifrunner.gnm1.ann1.K2HCDK	AhFBX50	Arahy.10：1591895-1593812	442	48.33	8.22	43.32	103.15	Plasma Membrane	Hydrophilicity
arahy.Tifrunner.gnm1.ann1.9W7Z3M	AhFBX51	Arahy.10：95764052-95768575	458	37.41	9.24	45.91	82.45	Chloroplast	Hydrophilicity
arahy.Tifrunner.gnm1.ann1.JKK1Y1	AhFBX52	Arahy.11：10535780-10537894	208	52.41	7.56	53.98	99.43	Plasma Membrane	Hydrophilicity
arahy.Tifrunner.gnm1.ann1.8FUA72	AhFBX53	Arahy.12：6873201-6877417	923	47.22	8.57	40.99	87.58	Plasma Membrane	Hydrophilicity
arahy.Tifrunner.gnm1.ann1.K4WWU7	AhFBX54	Arahy.13：126025211-126026431	450	46.09	5.88	31.68	87.59	Plasma Membrane	Hydrophilicity
arahy.Tifrunner.gnm1.ann1.W71BFG	AhFBX55	Arahy.13：144809642-144813539	1025	43.26	7.83	43.28	77.24	Chloroplast	Hydrophilicity
arahy.Tifrunner.gnm1.ann1.8GYA0C	AhFBX56	Arahy.13：145069629-145072914	444	51.01	9.19	54.18	84.63	Plasma Membrane	Hydrophilicity
arahy.Tifrunner.gnm1.ann1.FL9AGG	AhFBX57	Arahy.14：4586495-4589113	594	44.37	9.38	59.57	81.49	Nuclear	Hydrophilicity
arahy.Tifrunner.gnm1.ann1.YU67T7	AhFBX58	Arahy.14：132747017-132748966	260	50.19	9.42	45.16	94.97	Plasma Membrane	Hydrophilicity
arahy.Tifrunner.gnm1.ann1.ZT59C6	AhFBX59	Arahy.14：138989698-138991676	289	38.19	8.96	41.96	86.94	Extracellular	Hydrophilicity
arahy.Tifrunner.gnm1.ann1.LXV8AN	AhFBX60	Arahy.14：140805611-140808237	324	48.74	8.88	41.06	86.96	Nuclear	Hydrophilicity
arahy.Tifrunner.gnm1.ann1.II1KZ3	AhFBX61	Arahy.14：140766822-140769393	357	49.86	9.43	43.29	88.53	Plasma Membrane	Hydrophilicity
arahy.Tifrunner.gnm1.ann1.LPT1V0	AhFBX62	Arahy.14：140589158-140591261	336	45.11	6.28	43.16	86.22	Cytoplasmic	Hydrophilicity
arahy.Tifrunner.gnm1.ann1.S178WR	AhFBX63	Arahy.14：140784254-140786339	674	55.43	8.57	36.16	83.16	Extracellular	Hydrophilicity
arahy.Tifrunner.gnm1.ann1.YA6NJH	AhFBX64	Arahy.14：140604504-140607642	429	56.85	9.14	50.57	85.82	Plasma Membrane	Hydrophilicity
arahy.Tifrunner.gnm1.ann1.BNH673	AhFBX65	Arahy.14：140897329-140898537	787	45.97	9.16	36.77	88.03	Extracellular	Hydrophilicity
arahy.Tifrunner.gnm1.ann1.FJK5PX	AhFBX66	Arahy.14：140676485-140681022	468	82.52	8.76	42.25	88.09	Plasma Membrane	Hydrophilicity
arahy.Tifrunner.gnm1.ann1.HZK6PM	AhFBX67	Arahy.14：140817848-140819532	403	40.83	6.78	37.26	98.3	Plasma Membrane	Hydrophilicity
arahy.Tifrunner.gnm1.ann1.MAM16D	AhFBX68	Arahy.14：140744183-140746208	465	44.25	5.46	39.3	97.97	Plasma Membrane	Hydrophilicity
arahy.Tifrunner.gnm1.ann1.4I2C1H	AhFBX69	Arahy.14：140663622-140664773	395	44.73	9.09	36.3	91.85	Plasma Membrane	Hydrophilicity
arahy.Tifrunner.gnm1.ann1.M84CU1	AhFBX70	Arahy.14：140763554-140765206	315	49.92	9.06	37.89	92.08	Plasma Membrane	Hydrophilicity
arahy.Tifrunner.gnm1.ann1.68D2LB	AhFBX71	Arahy.14：140825770-140828390	503	43.61	6.26	35.14	96.94	Plasma Membrane	Hydrophilicity
arahy.Tifrunner.gnm1.ann1.LNZY0A	AhFBX72	Arahy.14：140780164-140781748	456	43.44	6.87	28.91	99.53	Plasma Membrane	Hydrophilicity
arahy.Tifrunner.gnm1.ann1.AEIW8D	AhFBX73	Arahy.14：140705453-140711064	361	85.32	8.56	42.67	90.54	Plasma Membrane	Hydrophilicity
arahy.Tifrunner.gnm1.ann1.RIMI91	AhFBX74	Arahy.15：20786250-20788722	495	53.84	5.41	60.57	88.05	Nuclear	Hydrophilicity
arahy.Tifrunner.gnm1.ann1.UIW2EQ	AhFBX75	Arahy.15：160180387-160183545	373	47.64	8.47	47.55	105.69	Nuclear	Hydrophilicity
arahy.Tifrunner.gnm1.ann1.DC671X	AhFBX76	Arahy.16：9543530-9546214	345	39.06	8.18	55.47	77.28	Nuclear	Hydrophilicity
arahy.Tifrunner.gnm1.ann1.YYE7NP	AhFBX77	Arahy.17：126637986-126642522	352	37.83	9.48	47.99	81.64	Mitochondrial	Hydrophilicity
arahy.Tifrunner.gnm1.ann1.DJE5AQ	AhFBX78	Arahy.17：128811306-128814028	366	52.34	5.65	48.71	78.5	Chloroplast	Hydrophilicity
arahy.Tifrunner.gnm1.ann1.3Z8CKB	AhFBX79	Arahy.19：1656679-1660348	463	42.62	9.01	47.06	107.55	Extracellular	Hydrophilicity
arahy.Tifrunner.gnm1.ann1.5FA8WQ	AhFBX80	Arahy.19：4048917-4054906	400	52.39	6.18	34.9	112.03	Plasma Membrane	Hydrophilicity
arahy.Tifrunner.gnm1.ann1.G4DFGN	AhFBX81	Arahy.19：4183030-4185647	454	52.29	7.24	39.65	102.21	Nuclear	Hydrophilicity
arahy.Tifrunner.gnm1.ann1.YXHH77	AhFBX82	Arahy.19：4288643-4292808	406	53.14	4.99	49.46	112.53	Plasma Membrane	Hydrophilicity
arahy.Tifrunner.gnm1.ann1.SVZ6B5	AhFBX83	Arahy.19：4118148-4120467	366	46.77	5.53	35.4	99.36	Nuclear	Hydrophilicity
arahy.Tifrunner.gnm1.ann1.X1Z13X	AhFBX84	Arahy.19：4134330-4153552	319	157.44	6.42	49.5	105.48	Plasma Membrane	Hydrophilicity
arahy.Tifrunner.gnm1.ann1.MZ50XC	AhFBX85	Arahy.19：4308061-4311531	386	50.09	6.15	48.42	105.72	Plasma Membrane	Hydrophilicity
arahy.Tifrunner.gnm1.ann1.CSTZ0U	AhFBX86	Arahy.19：4218526-4220840	392	51.06	5.11	57.97	109.11	Plasma Membrane	Hydrophilicity
arahy.Tifrunner.gnm1.ann1.PRFE0Z	AhFBX87	Arahy.19：4210891-4213636	220	54.02	8.19	52.16	97.86	Nuclear	Hydrophilicity
arahy.Tifrunner.gnm1.ann1.XH3FAH	AhFBX88	Arahy.19：4203330-4204108	399	25.03	8.77	55.81	96.92	Nuclear	Hydrophilicity
arahy.Tifrunner.gnm1.ann1.KU1CJZ	AhFBX89	Arahy.19：5723252-5724989	365	45.51	9.32	42.37	104.28	Nuclear	Hydrophilicity
arahy.Tifrunner.gnm1.ann1.NJ4UUV	AhFBX90	Arahy.19：7951561-7961121	350	54.72	8.31	33.87	93.88	Plasma Membrane	Hydrophilicity
arahy.Tifrunner.gnm1.ann1.CIN5QE	AhFBX91	Arahy.19：36668216-36670203	183	24.05	5.37	66.74	77.69	Chloroplast	Hydrophilicity
arahy.Tifrunner.gnm1.ann1.RJB6DE	AhFBX92	Arahy.19：138997755-139002566	309	55.22	6.15	48.1	95.46	Nuclear	Hydrophilicity
arahy.Tifrunner.gnm1.ann1.9X7FSY	AhFBX93	Arahy.19：156842029-156844489	345	55.44	5.69	52.67	99.08	Nuclear	Hydrophilicity
arahy.Tifrunner.gnm1.ann1.W5GG00	AhFBX94	Arahy.19：3672829-3677608	356	54.76	6.83	45.75	105.09	Plasma Membrane	Hydrophilicity
arahy.Tifrunner.gnm1.ann1.ZE2WHA	AhFBX95	scaffold_50:16019-23949	393	66.2	9.05	47.88	87.21	Plasma Membrane	Hydrophilicity

## Sheet: S3
Motif name	Motif Sequence
Motif 1	ILSRLPTKHLARTSCVSKRWR
Motif 2	CNTEIWVMKEYKVHSSWTL
Motif 3	AHLYGFGYDASQDDYLVVVAWQDKDGQYH
Motif 4	DFEVLGSCRGFVLLHRDPHFLVVWNPLTGSSKRISYSHIV
Motif 5	RDAILIFDLKERTFSTISAhEQ
Motif 6	SLISDPBFAELHFHHSPAATNACFFIEBNTM
Motif 7	YZIPCKDFRPLCLSSNGDIIGR
Motif 8	YWNSCGLFLNGAIHWVPYEL
Motif 9	LRTNSWINLDAALPKP
Motif 10	YGKVGYFIYNVRGDLLKHFKN

## Sheet: S4
Gene name	Gene location	Cis-acting elements
AhFBX1	9	MYC
AhFBX1	111	Box-4
AhFBX1	235	as-1
AhFBX1	235	CGTCA-motif
AhFBX1	235	TGACG-motif
AhFBX1	254	STRE
AhFBX1	271	MYC
AhFBX1	358	MYB
AhFBX1	358	MYB
AhFBX1	453	G-box
AhFBX1	479	WUN-motif
AhFBX1	484	ERE
AhFBX1	525	ERE
AhFBX1	540	ERE
AhFBX1	544	WUN-motif
AhFBX1	639	ARE
AhFBX1	739	MYC
AhFBX1	760	WUN-motif
AhFBX1	868	as-1
AhFBX1	868	CGTCA-motif
AhFBX1	868	TGACG-motif
AhFBX1	978	Box-4
AhFBX1	1000	Box-4
AhFBX1	1017	TCA-element
AhFBX1	1155	ERE
AhFBX1	1361	ERE
AhFBX1	1363	ERE
AhFBX1	1368	GATA-motif
AhFBX1	1445	TCA-element
AhFBX1	1476	AAGAA-motif
AhFBX1	1490	Box-4
AhFBX1	1531	Box-4
AhFBX1	1572	ERE
AhFBX1	1615	Box-4
AhFBX1	1674	ERE
AhFBX1	1695	ERE
AhFBX1	1741	ERE
AhFBX1	1845	MYC
AhFBX1	1852	as-1
AhFBX1	1852	CGTCA-motif
AhFBX1	1852	TGACG-motif
AhFBX1	1853	G-box
AhFBX1	1854	ABRE
AhFBX1	1869	ARE
AhFBX1	1966	MYC
AhFBX2	87	MYC
AhFBX2	188	MYC
AhFBX2	246	W-box
AhFBX2	290	MYC
AhFBX2	298	LTR
AhFBX2	379	MYC
AhFBX2	413	WUN-motif
AhFBX2	438	W-box
AhFBX2	472	Box-4
AhFBX2	489	LTR
AhFBX2	568	MYC
AhFBX2	631	TGACG-motif
AhFBX2	631	as-1
AhFBX2	631	CGTCA-motif
AhFBX2	851	ARE
AhFBX2	998	MYB
AhFBX2	1181	AAGAA-motif
AhFBX2	1400	MBS
AhFBX2	1400	MYB
AhFBX2	1496	Box-4
AhFBX2	1595	ERE
AhFBX2	1683	ERE
AhFBX2	1698	Box-4
AhFBX2	1702	ERE
AhFBX2	1793	MYB
AhFBX2	1793	MYB
AhFBX2	1832	Box-4
AhFBX2	1855	Box-4
AhFBX2	1871	Box-4
AhFBX2	1957	ARE
AhFBX3	198	MYC
AhFBX3	239	STRE
AhFBX3	445	TGACG-motif
AhFBX3	445	CGTCA-motif
AhFBX3	445	as-1
AhFBX3	508	ARE
AhFBX3	526	AAGAA-motif
AhFBX3	552	STRE
AhFBX3	557	MYC
AhFBX3	572	ARE
AhFBX3	657	ARE
AhFBX3	664	TCA-element
AhFBX3	713	MYC
AhFBX3	876	AAGAA-motif
AhFBX3	991	MYC
AhFBX3	1010	MBS
AhFBX3	1010	MYB
AhFBX3	1050	WUN-motif
AhFBX3	1120	Box-4
AhFBX3	1151	Box-4
AhFBX3	1178	MYB
AhFBX3	1178	MYB
AhFBX3	1289	MYC
AhFBX3	1311	MBS
AhFBX3	1311	MYB
AhFBX3	1387	W-box
AhFBX3	1432	TCT-motif
AhFBX3	1474	MYB
AhFBX3	1474	MYB
AhFBX3	1769	ERE
AhFBX3	1795	ERE
AhFBX4	10	Box-4
AhFBX4	107	WUN-motif
AhFBX4	158	Box-4
AhFBX4	247	Box-4
AhFBX4	247	AAGAA-motif
AhFBX4	291	ERE
AhFBX4	291	GATA-motif
AhFBX4	324	G-box
AhFBX4	324	AAGAA-motif
AhFBX4	325	MYB
AhFBX4	336	MYB
AhFBX4	336	ARE
AhFBX4	392	MYB
AhFBX4	440	MYB
AhFBX4	587	ERE
AhFBX4	587	ERE
AhFBX4	590	MYB
AhFBX4	715	G-box
AhFBX4	715	ABRE
AhFBX4	724	TCT-motif
AhFBX4	761	Box-4
AhFBX4	786	MYB
AhFBX4	818	MYB
AhFBX4	1104	MYB
AhFBX4	1169	LTR
AhFBX4	1417	Box-4
AhFBX4	1417	MYB
AhFBX4	1437	MYB
AhFBX4	1720	WUN-motif
AhFBX4	1721	as-1
AhFBX4	1721	CGTCA-motif
AhFBX4	1721	TGACG-motif
AhFBX4	1796	G-box
AhFBX4	1900	MYC
AhFBX4	1942	MYB
AhFBX4	1942	MYB
AhFBX4	1945	MYB
AhFBX5	68	Box-4
AhFBX5	103	WUN-motif
AhFBX5	121	Box-4
AhFBX5	246	Box-4
AhFBX5	323	AAGAA-motif
AhFBX5	416	ERE
AhFBX5	508	GATA-motif
AhFBX5	656	G-box
AhFBX5	876	AAGAA-motif
AhFBX5	1176	MYB
AhFBX5	1201	MYB
AhFBX5	1205	ARE
AhFBX5	1244	MYB
AhFBX5	1244	MYB
AhFBX5	1290	ERE
AhFBX5	1296	ERE
AhFBX5	1442	MYB
AhFBX5	1482	G-box
AhFBX5	1483	ABRE
AhFBX5	1493	TCT-motif
AhFBX5	1713	Box-4
AhFBX5	1801	MYB
AhFBX5	1805	MYB
AhFBX5	1805	MYB
AhFBX5	1818	LTR
AhFBX5	1942	Box-4
AhFBX5	1972	MYB
AhFBX5	1972	MYB
AhFBX5	1975	WUN-motif
AhFBX6	102	W-box
AhFBX6	105	MYC
AhFBX6	163	ERE
AhFBX6	169	ERE
AhFBX6	252	WUN-motif
AhFBX6	339	MYB
AhFBX6	355	TCT-motif
AhFBX6	357	WUN-motif
AhFBX6	436	ABRE
AhFBX6	436	G-box
AhFBX6	436	ABRE
AhFBX6	436	ABRE
AhFBX6	513	WUN-motif
AhFBX6	564	Box-4
AhFBX6	576	Box-4
AhFBX6	657	MYC
AhFBX6	874	CGTCA-motif
AhFBX6	874	TGACG-motif
AhFBX6	874	as-1
AhFBX6	989	TCA-element
AhFBX6	1015	MYC
AhFBX6	1044	MYC
AhFBX6	1202	MYB
AhFBX6	1202	MBS
AhFBX6	1282	ABRE
AhFBX6	1282	G-box
AhFBX6	1369	CGTCA-motif
AhFBX6	1369	TGACG-motif
AhFBX6	1369	as-1
AhFBX6	1370	G-box
AhFBX6	1371	ABRE
AhFBX6	1374	MYB
AhFBX6	1433	STRE
AhFBX6	1446	TCT-motif
AhFBX6	1524	MYC
AhFBX6	1667	WUN-motif
AhFBX6	1674	GATA-motif
AhFBX6	1820	TCA-element
AhFBX6	1933	MYB
AhFBX6	1971	MYB
AhFBX6	1971	MBS
AhFBX7	5	Box-4
AhFBX7	144	CGTCA-motif
AhFBX7	144	as-1
AhFBX7	144	TGACG-motif
AhFBX7	186	MYC
AhFBX7	226	Box-4
AhFBX7	287	Box-4
AhFBX7	407	ERE
AhFBX7	502	ERE
AhFBX7	622	MYC
AhFBX7	627	AAGAA-motif
AhFBX7	674	G-box
AhFBX7	675	ABRE
AhFBX7	697	MYC
AhFBX7	706	G-box
AhFBX7	735	STRE
AhFBX7	790	STRE
AhFBX7	833	G-box
AhFBX7	834	ABRE
AhFBX7	854	STRE
AhFBX7	881	AAGAA-motif
AhFBX7	886	GATA-motif
AhFBX7	947	GATA-motif
AhFBX7	992	MYB
AhFBX7	992	MYB
AhFBX7	1040	Box-4
AhFBX7	1099	ARE
AhFBX7	1178	MYB
AhFBX7	1292	ABRE
AhFBX7	1292	G-box
AhFBX7	1292	ABRE
AhFBX7	1292	ABRE
AhFBX7	1330	MYB
AhFBX7	1330	MYB
AhFBX7	1348	ERE
AhFBX7	1456	Box-4
AhFBX7	1482	ERE
AhFBX7	1502	Box-4
AhFBX7	1561	WUN-motif
AhFBX7	1729	Box-4
AhFBX7	1799	Box-4
AhFBX7	1809	Box-4
AhFBX7	1950	MYB
AhFBX8	119	Box-4
AhFBX8	140	TCA-element
AhFBX8	343	Box-4
AhFBX8	357	TCA-element
AhFBX8	365	GT1-motif
AhFBX8	390	ERE
AhFBX8	486	AAGAA-motif
AhFBX8	520	ERE
AhFBX8	533	WUN-motif
AhFBX8	593	MYC
AhFBX8	693	GATA-motif
AhFBX8	715	MYB
AhFBX8	715	MYB
AhFBX8	814	Box-4
AhFBX8	818	Box-4
AhFBX8	825	Box-4
AhFBX8	889	Box-4
AhFBX8	1023	Box-4
AhFBX8	1056	MYC
AhFBX8	1074	GATA-motif
AhFBX8	1080	MYC
AhFBX8	1092	AAGAA-motif
AhFBX8	1097	TCT-motif
AhFBX8	1116	MYC
AhFBX8	1182	ERE
AhFBX8	1245	ERE
AhFBX8	1438	TCT-motif
AhFBX8	1449	ERE
AhFBX8	1497	Box-4
AhFBX8	1501	Box-4
AhFBX8	1631	ARE
AhFBX8	1649	GATA-motif
AhFBX8	1710	MYB
AhFBX8	1710	MYB
AhFBX8	1780	AAGAA-motif
AhFBX8	1795	Box-4
AhFBX8	1799	Box-4
AhFBX8	1858	TCT-motif
AhFBX8	1969	AAGAA-motif
AhFBX9	47	STRE
AhFBX9	265	ARE
AhFBX9	488	GATA-motif
AhFBX9	554	ARE
AhFBX9	669	Box-4
AhFBX9	678	TCT-motif
AhFBX9	722	ARE
AhFBX9	838	ARE
AhFBX9	845	ARE
AhFBX9	877	MYB
AhFBX9	952	ARE
AhFBX9	1029	ERE
AhFBX9	1057	MYC
AhFBX9	1191	WUN-motif
AhFBX9	1210	TGACG-motif
AhFBX9	1210	CGTCA-motif
AhFBX9	1210	as-1
AhFBX9	1218	MYC
AhFBX9	1239	ARE
AhFBX9	1351	MYB
AhFBX9	1355	MYC
AhFBX9	1469	Box-4
AhFBX9	1492	Box-4
AhFBX9	1544	ERE
AhFBX9	1546	ERE
AhFBX9	1604	G-box
AhFBX9	1604	ABRE
AhFBX9	1607	AAGAA-motif
AhFBX9	1649	MYC
AhFBX9	1737	ERE
AhFBX9	1820	ERE
AhFBX9	1822	ERE
AhFBX9	1934	MYB
AhFBX9	1934	MYB
AhFBX9	1958	ABRE
AhFBX9	1960	ABRE
AhFBX9	1960	G-box
AhFBX9	1961	ABRE
AhFBX10	2	ERE
AhFBX10	189	Box-4
AhFBX10	217	Box-4
AhFBX10	588	MYB
AhFBX10	588	MYB
AhFBX10	633	TGACG-motif
AhFBX10	633	as-1
AhFBX10	633	CGTCA-motif
AhFBX10	813	ABRE
AhFBX10	813	ABRE
AhFBX10	813	G-box
AhFBX10	813	ABRE
AhFBX10	827	MBS
AhFBX10	827	MYB
AhFBX10	984	TGACG-motif
AhFBX10	984	as-1
AhFBX10	984	CGTCA-motif
AhFBX10	1025	MYB
AhFBX10	1025	MYB
AhFBX10	1075	AAGAA-motif
AhFBX10	1112	ARE
AhFBX10	1195	MBS
AhFBX10	1195	MYB
AhFBX10	1399	ERE
AhFBX10	1413	Box-4
AhFBX10	1533	Box-4
AhFBX10	1639	Box-4
AhFBX10	1678	Box-4
AhFBX10	1839	AAGAA-motif
AhFBX10	1883	Box-4
AhFBX10	1934	MYC
AhFBX11	184	Box-4
AhFBX11	192	ERE
AhFBX11	194	ERE
AhFBX11	201	ARE
AhFBX11	344	MYC
AhFBX11	583	Box-4
AhFBX11	617	MYC
AhFBX11	797	Box-4
AhFBX11	947	Box-4
AhFBX11	986	MYC
AhFBX11	1234	MYB
AhFBX11	1234	MYB
AhFBX11	1269	TGACG-motif
AhFBX11	1269	CGTCA-motif
AhFBX11	1269	as-1
AhFBX11	1318	TGACG-motif
AhFBX11	1318	CGTCA-motif
AhFBX11	1318	as-1
AhFBX11	1444	Box-4
AhFBX11	1462	Box-4
AhFBX11	1484	Box-4
AhFBX11	1555	ERE
AhFBX11	1663	Box-4
AhFBX11	1689	W-box
AhFBX11	1711	Box-4
AhFBX11	1714	GATA-motif
AhFBX11	1722	Box-4
AhFBX12	115	TGACG-motif
AhFBX12	115	as-1
AhFBX12	115	CGTCA-motif
AhFBX12	185	WUN-motif
AhFBX12	268	MYC
AhFBX12	490	Box-4
AhFBX12	683	ERE
AhFBX12	685	ERE
AhFBX12	831	AAGAA-motif
AhFBX12	833	WUN-motif
AhFBX12	876	Box-4
AhFBX12	1018	Box-4
AhFBX12	1042	MYC
AhFBX12	1097	ERE
AhFBX12	1116	TGACG-motif
AhFBX12	1116	as-1
AhFBX12	1116	CGTCA-motif
AhFBX12	1161	ERE
AhFBX12	1190	ERE
AhFBX12	1198	WUN-motif
AhFBX12	1208	ERE
AhFBX12	1330	ERE
AhFBX12	1453	WUN-motif
AhFBX12	1509	MYB
AhFBX12	1851	ARE
AhFBX12	1859	WUN-motif
AhFBX12	1875	ABRE
AhFBX12	1974	ARE
AhFBX13	63	ARE
AhFBX13	128	TCA-element
AhFBX13	134	TCA-element
AhFBX13	202	Box-4
AhFBX13	210	Box-4
AhFBX13	276	MYB
AhFBX13	286	Box-4
AhFBX13	322	Box-4
AhFBX13	341	Box-4
AhFBX13	354	Box-4
AhFBX13	394	Box-4
AhFBX13	402	Box-4
AhFBX13	440	Box-4
AhFBX13	444	Box-4
AhFBX13	457	Box-4
AhFBX13	498	Box-4
AhFBX13	543	MYC
AhFBX13	561	MYB
AhFBX13	561	MYB
AhFBX13	562	GT1-motif
AhFBX13	620	MYC
AhFBX13	691	MYB
AhFBX13	722	MYC
AhFBX13	736	TCA-element
AhFBX13	895	TGACG-motif
AhFBX13	895	CGTCA-motif
AhFBX13	895	as-1
AhFBX13	1171	Box-4
AhFBX13	1223	ARE
AhFBX13	1272	Box-4
AhFBX13	1310	ERE
AhFBX13	1474	Box-4
AhFBX13	1670	ERE
AhFBX13	1688	GATA-motif
AhFBX13	1769	Box-4
AhFBX13	1789	MYB
AhFBX13	1872	ERE
AhFBX13	1879	ERE
AhFBX13	1948	Box-4
AhFBX14	7	ERE
AhFBX14	185	Box-4
AhFBX14	261	GT1-motif
AhFBX14	352	WUN-motif
AhFBX14	571	Box-4
AhFBX14	589	MYC
AhFBX14	679	MYC
AhFBX14	817	Box-4
AhFBX14	1208	MYB
AhFBX14	1208	MYB
AhFBX14	1209	GT1-motif
AhFBX14	1262	Box-4
AhFBX14	1436	Box-4
AhFBX14	1465	GT1-motif
AhFBX14	1629	ERE
AhFBX14	1807	ERE
AhFBX14	1860	ERE
AhFBX14	1868	W-box
AhFBX14	1965	Box-4
AhFBX15	9	MYB
AhFBX15	164	TGACG-motif
AhFBX15	164	CGTCA-motif
AhFBX15	164	as-1
AhFBX15	169	MYB
AhFBX15	169	MYB
AhFBX15	183	STRE
AhFBX15	368	TCT-motif
AhFBX15	390	ABRE
AhFBX15	392	ABRE
AhFBX15	392	ABRE
AhFBX15	392	G-box
AhFBX15	393	ABRE
AhFBX15	398	MYC
AhFBX15	539	Box-4
AhFBX15	850	MYC
AhFBX15	1169	STRE
AhFBX15	1299	ARE
AhFBX15	1364	Box-4
AhFBX15	1380	Box-4
AhFBX15	1482	ERE
AhFBX15	1730	MYC
AhFBX15	1821	STRE
AhFBX15	1855	ARE
AhFBX15	1960	ARE
AhFBX15	1972	MYC
AhFBX16	37	Box-4
AhFBX16	51	ARE
AhFBX16	348	TCT-motif
AhFBX16	356	TCT-motif
AhFBX16	363	MYC
AhFBX16	389	GATA-motif
AhFBX16	509	TCT-motif
AhFBX16	571	TCT-motif
AhFBX16	662	MYC
AhFBX16	696	G-box
AhFBX16	723	as-1
AhFBX16	723	TGACG-motif
AhFBX16	723	CGTCA-motif
AhFBX16	753	TCT-motif
AhFBX16	826	WUN-motif
AhFBX16	857	MYC
AhFBX16	935	ERE
AhFBX16	997	MYC
AhFBX16	999	TCT-motif
AhFBX16	1164	WUN-motif
AhFBX16	1196	ERE
AhFBX16	1221	ARE
AhFBX16	1271	Box-4
AhFBX16	1297	ARE
AhFBX16	1309	ERE
AhFBX16	1401	MYB
AhFBX16	1416	MYB
AhFBX16	1416	MYB
AhFBX16	1417	GT1-motif
AhFBX16	1454	Box-4
AhFBX16	1654	ERE
AhFBX16	1764	Box-4
AhFBX16	1790	MYB
AhFBX16	1855	ERE
AhFBX16	1873	GT1-motif
AhFBX17	5	MYC
AhFBX17	14	LTR
AhFBX17	17	ARE
AhFBX17	49	G-box
AhFBX17	50	ABRE
AhFBX17	82	MYB
AhFBX17	97	STRE
AhFBX17	139	MYB
AhFBX17	215	Box-4
AhFBX17	268	MYB
AhFBX17	268	MYB
AhFBX17	291	TGACG-motif
AhFBX17	291	CGTCA-motif
AhFBX17	291	as-1
AhFBX17	293	GATA-motif
AhFBX17	321	ERE
AhFBX17	432	STRE
AhFBX17	567	MYC
AhFBX17	669	ERE
AhFBX17	757	MYC
AhFBX17	863	Box-4
AhFBX17	1018	ERE
AhFBX17	1127	GT1-motif
AhFBX17	1183	ERE
AhFBX17	1240	ERE
AhFBX17	1247	ERE
AhFBX17	1298	MYC
AhFBX17	1310	Box-4
AhFBX17	1543	Box-4
AhFBX17	1641	MYB
AhFBX17	1641	MYB
AhFBX17	1714	TGACG-motif
AhFBX17	1714	CGTCA-motif
AhFBX17	1714	as-1
AhFBX17	1832	W-box
AhFBX18	267	TCA-element
AhFBX18	289	MYB
AhFBX18	289	MBS
AhFBX18	375	TCA-element
AhFBX18	402	TCA-element
AhFBX18	583	MYB
AhFBX18	590	MYB
AhFBX18	590	MYB
AhFBX18	781	MYC
AhFBX18	901	ARE
AhFBX18	1049	ARE
AhFBX18	1119	G-box
AhFBX18	1240	Box-4
AhFBX18	1325	TCA-element
AhFBX18	1329	as-1
AhFBX18	1329	TGACG-motif
AhFBX18	1329	CGTCA-motif
AhFBX18	1363	ERE
AhFBX18	1393	ERE
AhFBX18	1440	G-box
AhFBX18	1441	ABRE
AhFBX18	1650	Box-4
AhFBX18	1751	ERE
AhFBX18	1758	ERE
AhFBX18	1829	MYB
AhFBX18	1829	MYB
AhFBX18	1907	STRE
AhFBX18	1913	STRE
AhFBX19	22	STRE
AhFBX19	49	STRE
AhFBX19	340	STRE
AhFBX19	510	Box-4
AhFBX19	652	MBS
AhFBX19	652	MYB
AhFBX19	700	AAGAA-motif
AhFBX19	736	WUN-motif
AhFBX19	801	AAGAA-motif
AhFBX19	898	CGTCA-motif
AhFBX19	898	as-1
AhFBX19	898	TGACG-motif
AhFBX19	945	Box-4
AhFBX19	1167	MYC
AhFBX19	1280	ERE
AhFBX19	1282	ERE
AhFBX19	1316	ARE
AhFBX19	1496	ARE
AhFBX19	1531	AAGAA-motif
AhFBX19	1548	TCA-element
AhFBX19	1581	MYB
AhFBX19	1581	MYB
AhFBX19	1716	GATA-motif
AhFBX19	1847	ARE
AhFBX19	1954	GT1-motif
AhFBX20	31	ARE
AhFBX20	95	ARE
AhFBX20	309	GATA-motif
AhFBX20	337	W-box
AhFBX20	341	STRE
AhFBX20	432	GT1-motif
AhFBX20	433	GT1-motif
AhFBX20	461	MYC
AhFBX20	522	ARE
AhFBX20	562	ARE
AhFBX20	598	MYC
AhFBX20	634	TCA-element
AhFBX20	807	MYB
AhFBX20	972	MYC
AhFBX20	1102	LTR
AhFBX20	1130	STRE
AhFBX20	1173	MYC
AhFBX20	1190	TCA-element
AhFBX20	1250	MYB
AhFBX20	1250	MYB
AhFBX20	1287	Box-4
AhFBX20	1330	MYB
AhFBX20	1330	MYB
AhFBX20	1331	GT1-motif
AhFBX20	1375	WUN-motif
AhFBX20	1430	STRE
AhFBX20	1464	GT1-motif
AhFBX20	1465	MYB
AhFBX20	1465	MYB
AhFBX20	1490	MYC
AhFBX20	1492	TCT-motif
AhFBX20	1509	MYC
AhFBX20	1530	MYC
AhFBX20	1537	MYB
AhFBX20	1537	MYB
AhFBX20	1553	WUN-motif
AhFBX20	1564	STRE
AhFBX20	1649	MYC
AhFBX20	1675	MYC
AhFBX20	1679	MYB
AhFBX20	1679	MYB
AhFBX20	1729	ERE
AhFBX20	1740	Box-4
AhFBX20	1771	MYB
AhFBX20	1783	W-box
AhFBX21	28	Box-4
AhFBX21	43	TCA-element
AhFBX21	182	MYB
AhFBX21	182	MYB
AhFBX21	357	GT1-motif
AhFBX21	358	GT1-motif
AhFBX21	412	MYB
AhFBX21	412	MYB
AhFBX21	413	GT1-motif
AhFBX21	458	MYC
AhFBX21	467	TCA-element
AhFBX21	493	GATA-motif
AhFBX21	544	MYC
AhFBX21	695	Box-4
AhFBX21	700	ERE
AhFBX21	706	ERE
AhFBX21	867	MYC
AhFBX21	885	MYC
AhFBX21	918	LTR
AhFBX21	945	ARE
AhFBX21	961	ERE
AhFBX21	1068	MYC
AhFBX21	1089	MYC
AhFBX21	1110	ERE
AhFBX21	1357	G-box
AhFBX21	1358	ABRE
AhFBX21	1410	CGTCA-motif
AhFBX21	1410	TGACG-motif
AhFBX21	1410	as-1
AhFBX21	1416	STRE
AhFBX21	1621	ARE
AhFBX21	1642	ERE
AhFBX21	1707	Box-4
AhFBX21	1742	ERE
AhFBX21	1749	ERE
AhFBX21	1849	ERE
AhFBX21	1950	STRE
AhFBX22	57	MYB
AhFBX22	97	MYB
AhFBX22	161	TCT-motif
AhFBX22	202	MYB
AhFBX22	202	MYB
AhFBX22	330	MYC
AhFBX22	355	MYB
AhFBX22	355	MYB
AhFBX22	407	MYB
AhFBX22	407	MYB
AhFBX22	408	GT1-motif
AhFBX22	648	MBS
AhFBX22	648	MYB
AhFBX22	769	MYC
AhFBX22	806	WUN-motif
AhFBX22	993	STRE
AhFBX22	1024	ARE
AhFBX22	1073	STRE
AhFBX22	1250	Box-4
AhFBX22	1254	Box-4
AhFBX22	1265	TCA-element
AhFBX22	1326	MYB
AhFBX22	1326	MYB
AhFBX22	1356	Box-4
AhFBX22	1399	MYB
AhFBX22	1399	MYB
AhFBX22	1400	GT1-motif
AhFBX22	1572	W-box
AhFBX22	1702	MYC
AhFBX22	1724	Box-4
AhFBX22	1767	W-box
AhFBX22	1808	MYB
AhFBX22	1849	MYB
AhFBX22	1882	LTR
AhFBX22	1890	STRE
AhFBX23	136	MYB
AhFBX23	140	G-box
AhFBX23	181	MYC
AhFBX23	210	MYC
AhFBX23	227	MYC
AhFBX23	317	AAGAA-motif
AhFBX23	621	Box-4
AhFBX23	647	MYB
AhFBX23	662	WUN-motif
AhFBX23	732	ERE
AhFBX23	739	MYB
AhFBX23	739	MYB
AhFBX23	740	GT1-motif
AhFBX23	846	MYB
AhFBX23	846	MYB
AhFBX23	847	GT1-motif
AhFBX23	899	ERE
AhFBX23	941	MYC
AhFBX23	1083	ERE
AhFBX23	1195	Box-4
AhFBX23	1208	ERE
AhFBX23	1306	ABRE
AhFBX23	1306	ABRE
AhFBX23	1306	ABRE
AhFBX23	1306	G-box
AhFBX23	1366	Box-4
AhFBX23	1486	ARE
AhFBX23	1590	ERE
AhFBX23	1616	WUN-motif
AhFBX23	1723	TCA-element
AhFBX23	1900	LTR
AhFBX23	1955	GT1-motif
AhFBX24	15	MYB
AhFBX24	51	GATA-motif
AhFBX24	78	G-box
AhFBX24	78	ABRE
AhFBX24	107	GT1-motif
AhFBX24	108	MYB
AhFBX24	108	MYB
AhFBX24	357	AAGAA-motif
AhFBX24	474	ERE
AhFBX24	588	ARE
AhFBX24	611	Box-4
AhFBX24	806	Box-4
AhFBX24	810	Box-4
AhFBX24	815	ERE
AhFBX24	901	ARE
AhFBX24	957	AAGAA-motif
AhFBX24	1013	MYB
AhFBX24	1096	MYC
AhFBX24	1147	GATA-motif
AhFBX24	1218	TCT-motif
AhFBX24	1244	ARE
AhFBX24	1366	ERE
AhFBX24	1466	ERE
AhFBX24	1473	ERE
AhFBX24	1498	MYC
AhFBX24	1580	MYC
AhFBX24	1652	AAGAA-motif
AhFBX24	1857	ERE
AhFBX24	1883	Box-4
AhFBX24	1930	W-box
AhFBX25	33	Box-4
AhFBX25	150	MYB
AhFBX25	178	ABRE
AhFBX25	179	G-box
AhFBX25	180	ABRE
AhFBX25	180	G-box
AhFBX25	180	G-box
AhFBX25	181	ABRE
AhFBX25	365	Box-4
AhFBX25	676	Box-4
AhFBX25	822	MYC
AhFBX25	830	TCT-motif
AhFBX25	908	MYB
AhFBX25	956	Box-4
AhFBX25	1000	ERE
AhFBX25	1013	TCT-motif
AhFBX25	1015	WUN-motif
AhFBX25	1093	Box-4
AhFBX25	1135	W-box
AhFBX25	1154	GT1-motif
AhFBX25	1176	MYB
AhFBX25	1188	Box-4
AhFBX25	1243	Box-4
AhFBX25	1296	TCT-motif
AhFBX25	1332	MYB
AhFBX25	1339	ARE
AhFBX25	1356	STRE
AhFBX25	1450	TCA-element
AhFBX25	1511	GT1-motif
AhFBX25	1542	TCT-motif
AhFBX25	1594	MYB
AhFBX25	1598	ARE
AhFBX25	1606	MYB
AhFBX25	1650	MYB
AhFBX25	1661	MYB
AhFBX25	1661	MYB
AhFBX25	1751	ARE
AhFBX25	1793	MYB
AhFBX25	1809	ARE
AhFBX25	1815	CGTCA-motif
AhFBX25	1815	TGACG-motif
AhFBX25	1815	as-1
AhFBX25	1816	G-box
AhFBX25	1817	ABRE
AhFBX25	1895	MYB
AhFBX25	1925	MYC
AhFBX25	1940	Box-4
AhFBX25	1944	Box-4
AhFBX25	1948	Box-4
AhFBX25	1952	Box-4
AhFBX25	1969	GT1-motif
AhFBX26	186	GT1-motif
AhFBX26	201	MYC
AhFBX26	225	STRE
AhFBX26	340	ARE
AhFBX26	408	MBS
AhFBX26	408	MYB
AhFBX26	424	ARE
AhFBX26	616	MBS
AhFBX26	616	MYB
AhFBX26	619	MYB
AhFBX26	619	MYB
AhFBX26	674	WUN-motif
AhFBX26	675	WUN-motif
AhFBX26	688	Box-4
AhFBX26	1021	ERE
AhFBX26	1036	Box-4
AhFBX26	1040	Box-4
AhFBX26	1179	Box-4
AhFBX26	1230	Box-4
AhFBX26	1313	MYB
AhFBX26	1313	MYB
AhFBX26	1438	Box-4
AhFBX26	1451	Box-4
AhFBX26	1490	GT1-motif
AhFBX26	1491	GT1-motif
AhFBX26	1492	MYB
AhFBX26	1492	MYB
AhFBX26	1695	G-box
AhFBX26	1734	ERE
AhFBX26	1815	MBS
AhFBX26	1815	MYB
AhFBX26	1854	LTR
AhFBX26	1919	TCA-element
AhFBX27	12	ABRE
AhFBX27	215	Box-4
AhFBX27	327	MYB
AhFBX27	327	MYB
AhFBX27	328	GT1-motif
AhFBX27	402	G-box
AhFBX27	476	Box-4
AhFBX27	546	ABRE
AhFBX27	547	G-box
AhFBX27	548	G-box
AhFBX27	548	ABRE
AhFBX27	548	G-box
AhFBX27	549	ABRE
AhFBX27	666	MYC
AhFBX27	809	ARE
AhFBX27	844	WUN-motif
AhFBX27	1001	STRE
AhFBX27	1012	G-box
AhFBX27	1013	ABRE
AhFBX27	1014	G-box
AhFBX27	1015	G-box
AhFBX27	1015	ABRE
AhFBX27	1015	G-box
AhFBX27	1016	ABRE
AhFBX27	1120	STRE
AhFBX27	1329	TCA-element
AhFBX27	1336	ARE
AhFBX27	1470	STRE
AhFBX27	1494	MYB
AhFBX27	1560	MYC
AhFBX27	1622	MYB
AhFBX27	1622	MYB
AhFBX27	1715	G-box
AhFBX27	1716	ABRE
AhFBX27	1742	ARE
AhFBX27	1847	GATA-motif
AhFBX27	1982	MYC
AhFBX28	447	ERE
AhFBX28	513	Box-4
AhFBX28	683	STRE
AhFBX28	912	ERE
AhFBX28	968	TCA-element
AhFBX28	973	GATA-motif
AhFBX28	1005	Box-4
AhFBX28	1130	Box-4
AhFBX28	1143	Box-4
AhFBX28	1167	GATA-motif
AhFBX28	1253	ERE
AhFBX28	1255	ERE
AhFBX28	1435	ARE
AhFBX28	1445	TGACG-motif
AhFBX28	1445	as-1
AhFBX28	1445	CGTCA-motif
AhFBX28	1555	MYB
AhFBX28	1555	MYB
AhFBX28	1575	ARE
AhFBX28	1594	W-box
AhFBX28	1744	MYC
AhFBX28	1865	STRE
AhFBX29	72	AAGAA-motif
AhFBX29	76	AAGAA-motif
AhFBX29	193	LTR
AhFBX29	291	TCA-element
AhFBX29	392	TCA-element
AhFBX29	402	TCA-element
AhFBX29	461	MYB
AhFBX29	513	ARE
AhFBX29	533	ERE
AhFBX29	575	Box-4
AhFBX29	649	MYB
AhFBX29	720	G-box
AhFBX29	741	G-box
AhFBX29	866	TCA-element
AhFBX29	869	TCA-element
AhFBX29	875	TCA-element
AhFBX29	1001	WUN-motif
AhFBX29	1012	TCA-element
AhFBX29	1044	AAGAA-motif
AhFBX29	1048	AAGAA-motif
AhFBX29	1426	ERE
AhFBX29	1494	GATA-motif
AhFBX29	1524	ABRE
AhFBX29	1524	ABRE
AhFBX29	1524	G-box
AhFBX29	1524	ABRE
AhFBX29	1525	ABRE
AhFBX29	1653	G-box
AhFBX29	1653	ABRE
AhFBX29	1708	Box-4
AhFBX29	1784	Box-4
AhFBX29	1806	ABRE
AhFBX29	1806	ABRE
AhFBX29	1806	G-box
AhFBX29	1807	ABRE
AhFBX29	1912	Box-4
AhFBX29	1923	MYC
AhFBX30	20	MYC
AhFBX30	379	Box-4
AhFBX30	389	Box-4
AhFBX30	477	TCT-motif
AhFBX30	523	Box-4
AhFBX30	545	Box-4
AhFBX30	639	W-box
AhFBX30	657	MYC
AhFBX30	704	AAGAA-motif
AhFBX30	877	AAGAA-motif
AhFBX30	892	Box-4
AhFBX30	990	TCA-element
AhFBX30	1019	MYB
AhFBX30	1019	MYB
AhFBX30	1056	TCT-motif
AhFBX30	1057	MYC
AhFBX30	1125	MYC
AhFBX30	1214	MYC
AhFBX30	1221	MYB
AhFBX30	1484	MYB
AhFBX30	1484	MYB
AhFBX30	1550	MYC
AhFBX30	1571	STRE
AhFBX30	1785	MYB
AhFBX30	1785	MYB
AhFBX30	1963	MYB
AhFBX30	1985	LTR
AhFBX31	108	MYC
AhFBX31	169	ARE
AhFBX31	227	MYB
AhFBX31	268	ABRE
AhFBX31	274	LTR
AhFBX31	384	Box-4
AhFBX31	536	Box-4
AhFBX31	595	LTR
AhFBX31	689	ERE
AhFBX31	697	TCT-motif
AhFBX31	856	LTR
AhFBX31	897	MYC
AhFBX31	1032	MYB
AhFBX31	1089	MYC
AhFBX31	1143	ERE
AhFBX31	1304	MYC
AhFBX31	1352	ARE
AhFBX31	1356	MYB
AhFBX31	1448	WUN-motif
AhFBX31	1596	LTR
AhFBX31	1616	GATA-motif
AhFBX31	1710	STRE
AhFBX31	1739	ARE
AhFBX31	1794	G-box
AhFBX31	1795	G-box
AhFBX31	1796	ABRE
AhFBX31	1862	Box-4
AhFBX31	1919	MYC
AhFBX32	152	LTR
AhFBX32	191	TCT-motif
AhFBX32	204	STRE
AhFBX32	210	AAGAA-motif
AhFBX32	277	MYB
AhFBX32	277	MYB
AhFBX32	278	GT1-motif
AhFBX32	305	STRE
AhFBX32	453	MYB
AhFBX32	486	Box-4
AhFBX32	555	MYC
AhFBX32	567	TCA-element
AhFBX32	784	TGACG-motif
AhFBX32	784	as-1
AhFBX32	784	CGTCA-motif
AhFBX32	820	ARE
AhFBX32	877	G-box
AhFBX32	877	ABRE
AhFBX32	877	ABRE
AhFBX32	878	ABRE
AhFBX32	900	G-box
AhFBX32	903	ABRE
AhFBX32	903	G-box
AhFBX32	905	ABRE
AhFBX32	905	G-box
AhFBX32	905	G-box
AhFBX32	906	ABRE
AhFBX32	914	Box-4
AhFBX32	969	STRE
AhFBX32	975	STRE
AhFBX32	1074	Box-4
AhFBX32	1185	AAGAA-motif
AhFBX32	1319	Box-4
AhFBX32	1323	Box-4
AhFBX32	1332	MYB
AhFBX32	1487	MYB
AhFBX32	1516	LTR
AhFBX32	1639	STRE
AhFBX32	1677	MYB
AhFBX32	1691	AAGAA-motif
AhFBX32	1695	AAGAA-motif
AhFBX32	1767	G-box
AhFBX32	1801	GT1-motif
AhFBX32	1802	MYB
AhFBX32	1802	MYB
AhFBX32	1829	G-box
AhFBX32	1830	ABRE
AhFBX32	1901	MYC
AhFBX32	1907	MYB
AhFBX32	1942	ERE
AhFBX33	1	MYB
AhFBX33	1	MYB
AhFBX33	52	Box-4
AhFBX33	54	TCA-element
AhFBX33	155	LTR
AhFBX33	164	Box-4
AhFBX33	330	ABRE
AhFBX33	330	G-box
AhFBX33	330	G-box
AhFBX33	331	ABRE
AhFBX33	368	MYB
AhFBX33	368	MYB
AhFBX33	388	AAGAA-motif
AhFBX33	480	MYB
AhFBX33	499	TCA-element
AhFBX33	528	AAGAA-motif
AhFBX33	586	TCA-element
AhFBX33	592	TCA-element
AhFBX33	606	MYB
AhFBX33	1061	W-box
AhFBX33	1173	ERE
AhFBX33	1281	MYC
AhFBX33	1507	Box-4
AhFBX33	1678	ARE
AhFBX33	1850	ABRE
AhFBX33	1850	G-box
AhFBX34	219	TCT-motif
AhFBX34	350	ERE
AhFBX34	450	MYC
AhFBX34	498	MYC
AhFBX34	559	W-box
AhFBX34	672	STRE
AhFBX34	791	TCA-element
AhFBX34	887	STRE
AhFBX34	926	STRE
AhFBX34	936	STRE
AhFBX34	964	MYB
AhFBX34	964	MYB
AhFBX34	1044	STRE
AhFBX34	1049	AAGAA-motif
AhFBX34	1092	STRE
AhFBX34	1399	MYB
AhFBX34	1410	as-1
AhFBX34	1410	CGTCA-motif
AhFBX34	1410	TGACG-motif
AhFBX34	1429	as-1
AhFBX34	1429	CGTCA-motif
AhFBX34	1429	TGACG-motif
AhFBX34	1495	TCA-element
AhFBX34	1512	GATA-motif
AhFBX34	1599	WUN-motif
AhFBX34	1600	WUN-motif
AhFBX34	1658	WUN-motif
AhFBX34	1659	WUN-motif
AhFBX34	1669	ERE
AhFBX34	1908	ARE
AhFBX35	114	ERE
AhFBX35	124	STRE
AhFBX35	155	G-box
AhFBX35	157	G-box
AhFBX35	157	G-box
AhFBX35	157	ABRE
AhFBX35	158	ABRE
AhFBX35	239	ABRE
AhFBX35	247	STRE
AhFBX35	262	ERE
AhFBX35	273	Box-4
AhFBX35	320	LTR
AhFBX35	464	MYB
AhFBX35	495	MYB
AhFBX35	495	MYB
AhFBX35	514	MYC
AhFBX35	563	CGTCA-motif
AhFBX35	563	TGACG-motif
AhFBX35	563	as-1
AhFBX35	588	MYB
AhFBX35	601	MYC
AhFBX35	609	CGTCA-motif
AhFBX35	609	TGACG-motif
AhFBX35	609	as-1
AhFBX35	612	CGTCA-motif
AhFBX35	612	TGACG-motif
AhFBX35	612	as-1
AhFBX35	724	TCT-motif
AhFBX35	738	W-box
AhFBX35	788	STRE
AhFBX35	819	W-box
AhFBX35	832	GT1-motif
AhFBX35	869	MYB
AhFBX35	869	MYB
AhFBX35	1162	MYC
AhFBX35	1368	GATA-motif
AhFBX35	1460	Box-4
AhFBX35	1475	Box-4
AhFBX35	1597	STRE
AhFBX35	1802	LTR
AhFBX35	1906	MYB
AhFBX35	1906	MYB
AhFBX35	1963	GATA-motif
AhFBX36	46	GATA-motif
AhFBX36	121	MYB
AhFBX36	121	MYB
AhFBX36	396	MYB
AhFBX36	406	MYB
AhFBX36	406	MYB
AhFBX36	419	STRE
AhFBX36	472	MYB
AhFBX36	534	MYB
AhFBX36	547	MYB
AhFBX36	547	MYB
AhFBX36	689	GT1-motif
AhFBX36	881	STRE
AhFBX36	903	ABRE
AhFBX36	903	G-box
AhFBX36	1012	AAGAA-motif
AhFBX36	1064	STRE
AhFBX36	1232	MYB
AhFBX36	1254	ARE
AhFBX36	1284	ARE
AhFBX36	1316	ERE
AhFBX36	1335	ARE
AhFBX36	1351	ERE
AhFBX36	1500	G-box
AhFBX36	1501	ABRE
AhFBX36	1501	G-box
AhFBX36	1501	ABRE
AhFBX36	1502	ABRE
AhFBX36	1537	TCT-motif
AhFBX36	1554	TGACG-motif
AhFBX36	1554	CGTCA-motif
AhFBX36	1554	as-1
AhFBX36	1565	MYB
AhFBX36	1602	MYC
AhFBX36	1654	ERE
AhFBX36	1661	ERE
AhFBX36	1668	ERE
AhFBX36	1694	TGACG-motif
AhFBX36	1694	CGTCA-motif
AhFBX36	1694	as-1
AhFBX36	1768	MYB
AhFBX36	1870	MYB
AhFBX37	91	MYC
AhFBX37	124	ERE
AhFBX37	141	CGTCA-motif
AhFBX37	141	TGACG-motif
AhFBX37	141	as-1
AhFBX37	281	ARE
AhFBX37	331	Box-4
AhFBX37	450	MYC
AhFBX37	561	G-box
AhFBX37	562	ABRE
AhFBX37	567	MBS
AhFBX37	567	MYB
AhFBX37	666	STRE
AhFBX37	743	TCA-element
AhFBX37	764	Box-4
AhFBX37	768	ERE
AhFBX37	770	ERE
AhFBX37	826	ARE
AhFBX37	870	MYB
AhFBX37	870	MYB
AhFBX37	932	LTR
AhFBX37	969	WUN-motif
AhFBX37	1007	Box-4
AhFBX37	1098	MYB
AhFBX37	1098	MYB
AhFBX37	1176	AAGAA-motif
AhFBX37	1197	MYB
AhFBX37	1253	CGTCA-motif
AhFBX37	1253	TGACG-motif
AhFBX37	1253	as-1
AhFBX37	1328	MBS
AhFBX37	1328	MYB
AhFBX37	1472	G-box
AhFBX37	1472	ABRE
AhFBX37	1480	TCT-motif
AhFBX37	1490	STRE
AhFBX37	1547	ERE
AhFBX37	1661	GT1-motif
AhFBX37	1678	AAGAA-motif
AhFBX37	1747	LTR
AhFBX37	1850	ERE
AhFBX37	1858	GATA-motif
AhFBX37	1949	W-box
AhFBX37	1959	MYC
AhFBX38	87	MYB
AhFBX38	156	CGTCA-motif
AhFBX38	156	as-1
AhFBX38	156	TGACG-motif
AhFBX38	215	CGTCA-motif
AhFBX38	215	as-1
AhFBX38	215	TGACG-motif
AhFBX38	332	CGTCA-motif
AhFBX38	332	as-1
AhFBX38	332	TGACG-motif
AhFBX38	340	MBS
AhFBX38	340	MYB
AhFBX38	352	AAGAA-motif
AhFBX38	361	CGTCA-motif
AhFBX38	361	as-1
AhFBX38	361	TGACG-motif
AhFBX38	364	MYC
AhFBX38	651	ERE
AhFBX38	806	MYC
AhFBX38	863	Box-4
AhFBX38	930	CGTCA-motif
AhFBX38	930	as-1
AhFBX38	930	TGACG-motif
AhFBX38	943	W-box
AhFBX38	1026	MYC
AhFBX38	1148	Box-4
AhFBX38	1242	GT1-motif
AhFBX38	1271	GATA-motif
AhFBX38	1286	STRE
AhFBX38	1297	STRE
AhFBX38	1353	GT1-motif
AhFBX38	1373	WUN-motif
AhFBX38	1570	TCA-element
AhFBX38	1605	AAGAA-motif
AhFBX38	1632	GT1-motif
AhFBX38	1633	GT1-motif
AhFBX38	1634	MYB
AhFBX38	1634	MYB
AhFBX38	1730	MYB
AhFBX38	1766	STRE
AhFBX38	1832	MYC
AhFBX38	1913	CGTCA-motif
AhFBX38	1913	as-1
AhFBX38	1913	TGACG-motif
AhFBX39	49	TCT-motif
AhFBX39	89	MYC
AhFBX39	181	GT1-motif
AhFBX39	189	STRE
AhFBX39	210	GT1-motif
AhFBX39	223	MYC
AhFBX39	345	MYC
AhFBX39	477	TCT-motif
AhFBX39	563	ARE
AhFBX39	776	MYB
AhFBX39	776	MYB
AhFBX39	793	MYC
AhFBX39	808	GT1-motif
AhFBX39	827	ARE
AhFBX39	924	CGTCA-motif
AhFBX39	924	TGACG-motif
AhFBX39	924	as-1
AhFBX39	996	MYB
AhFBX39	996	MYB
AhFBX39	997	GT1-motif
AhFBX39	1085	TCT-motif
AhFBX39	1207	GT1-motif
AhFBX39	1208	MYB
AhFBX39	1208	MYB
AhFBX39	1289	MYC
AhFBX39	1510	Box-4
AhFBX39	1727	Box-4
AhFBX39	1887	Box-4
AhFBX39	1924	MYB
AhFBX39	1924	MYB
AhFBX39	1943	ARE
AhFBX39	1983	ARE
AhFBX40	111	AAGAA-motif
AhFBX40	179	MYB
AhFBX40	179	MYB
AhFBX40	312	as-1
AhFBX40	312	TGACG-motif
AhFBX40	312	CGTCA-motif
AhFBX40	416	MYB
AhFBX40	622	as-1
AhFBX40	622	TGACG-motif
AhFBX40	622	CGTCA-motif
AhFBX40	722	WUN-motif
AhFBX40	815	WUN-motif
AhFBX40	913	Box-4
AhFBX40	1135	Box-4
AhFBX40	1158	ARE
AhFBX40	1178	Box-4
AhFBX40	1431	MYB
AhFBX40	1468	Box-4
AhFBX40	1622	Box-4
AhFBX40	1647	TCA-element
AhFBX40	1662	AAGAA-motif
AhFBX40	1696	MYB
AhFBX40	1736	G-box
AhFBX40	1738	G-box
AhFBX40	1739	ABRE
AhFBX40	1790	ARE
AhFBX40	1861	Box-4
AhFBX40	1980	STRE
AhFBX41	88	MYC
AhFBX41	187	MYB
AhFBX41	187	MYB
AhFBX41	299	MYB
AhFBX41	299	MYB
AhFBX41	312	MYB
AhFBX41	312	MYB
AhFBX41	613	MYB
AhFBX41	613	MBS
AhFBX41	677	MYB
AhFBX41	677	MBS
AhFBX41	1201	MYC
AhFBX41	1230	MYB
AhFBX41	1230	MYB
AhFBX41	1305	ABRE
AhFBX41	1305	G-box
AhFBX41	1326	MYB
AhFBX41	1442	MYB
AhFBX41	1583	MYC
AhFBX41	1598	MYC
AhFBX41	1644	MYB
AhFBX41	1644	MBS
AhFBX41	1683	ERE
AhFBX41	1742	Box-4
AhFBX41	1803	MYC
AhFBX41	1809	STRE
AhFBX41	1811	G-box
AhFBX41	1815	G-box
AhFBX41	1816	G-box
AhFBX41	1816	ABRE
AhFBX41	1816	G-box
AhFBX41	1817	ABRE
AhFBX41	1876	MYB
AhFBX41	1876	MBS
AhFBX41	1972	MYB
AhFBX41	1972	MYB
AhFBX42	45	TCA-element
AhFBX42	208	TGACG-motif
AhFBX42	208	as-1
AhFBX42	208	CGTCA-motif
AhFBX42	268	MYC
AhFBX42	304	MYC
AhFBX42	347	ARE
AhFBX42	358	TGACG-motif
AhFBX42	358	as-1
AhFBX42	358	CGTCA-motif
AhFBX42	408	ERE
AhFBX42	446	ERE
AhFBX42	448	ERE
AhFBX42	478	ERE
AhFBX42	508	GT1-motif
AhFBX42	509	GT1-motif
AhFBX42	510	MYB
AhFBX42	510	MYB
AhFBX42	606	GATA-motif
AhFBX42	641	Box-4
AhFBX42	660	MYC
AhFBX42	714	Box-4
AhFBX42	755	AAGAA-motif
AhFBX42	853	GATA-motif
AhFBX42	858	GATA-motif
AhFBX42	1083	TCA-element
AhFBX42	1211	G-box
AhFBX42	1212	ABRE
AhFBX42	1293	TCA-element
AhFBX42	1340	WUN-motif
AhFBX42	1434	WUN-motif
AhFBX42	1611	WUN-motif
AhFBX42	1664	TCA-element
AhFBX42	1731	MYB
AhFBX42	1752	WUN-motif
AhFBX42	1772	AAGAA-motif
AhFBX42	1807	TCT-motif
AhFBX42	1917	TCA-element
AhFBX43	2	ARE
AhFBX43	88	MYB
AhFBX43	268	TCA-element
AhFBX43	284	ERE
AhFBX43	385	TCA-element
AhFBX43	478	G-box
AhFBX43	478	ABRE
AhFBX43	478	ABRE
AhFBX43	478	ABRE
AhFBX43	595	TCT-motif
AhFBX43	614	Box-4
AhFBX43	622	ERE
AhFBX43	1030	ERE
AhFBX43	1037	Box-4
AhFBX43	1150	ERE
AhFBX43	1314	MYB
AhFBX43	1398	Box-4
AhFBX43	1567	Box-4
AhFBX43	1578	ERE
AhFBX43	1658	Box-4
AhFBX43	1783	ERE
AhFBX43	1903	Box-4
AhFBX43	1974	LTR
AhFBX43	1977	ARE
AhFBX43	1984	MYB
AhFBX44	119	MYC
AhFBX44	173	TCT-motif
AhFBX44	195	Box-4
AhFBX44	381	Box-4
AhFBX44	424	TCT-motif
AhFBX44	483	ERE
AhFBX44	524	MYB
AhFBX44	574	ERE
AhFBX44	629	Box-4
AhFBX44	794	ARE
AhFBX44	829	Box-4
AhFBX44	1018	Box-4
AhFBX44	1034	MYC
AhFBX44	1063	W-box
AhFBX44	1149	GT1-motif
AhFBX44	1150	GT1-motif
AhFBX44	1201	MYC
AhFBX44	1220	GATA-motif
AhFBX44	1274	MYB
AhFBX44	1301	ERE
AhFBX44	1308	ERE
AhFBX44	1367	MYB
AhFBX44	1404	Box-4
AhFBX44	1502	ERE
AhFBX44	1504	ERE
AhFBX44	1524	Box-4
AhFBX44	1528	Box-4
AhFBX44	1535	Box-4
AhFBX44	1545	Box-4
AhFBX44	1592	WUN-motif
AhFBX44	1647	MYC
AhFBX44	1715	W-box
AhFBX44	1726	GT1-motif
AhFBX44	1727	MYB
AhFBX44	1727	MYB
AhFBX44	1803	Box-4
AhFBX44	1808	MYB
AhFBX44	1808	MYB
AhFBX44	1814	Box-4
AhFBX44	1888	GT1-motif
AhFBX44	1889	GT1-motif
AhFBX44	1890	MYB
AhFBX44	1890	MYB
AhFBX44	1963	MYB
AhFBX45	15	ERE
AhFBX45	135	MYB
AhFBX45	135	MYB
AhFBX45	192	Box-4
AhFBX45	537	GATA-motif
AhFBX45	703	GATA-motif
AhFBX45	796	TCA-element
AhFBX45	807	ABRE
AhFBX45	807	G-box
AhFBX45	899	ERE
AhFBX45	913	WUN-motif
AhFBX45	938	ERE
AhFBX45	1017	Box-4
AhFBX45	1026	MYB
AhFBX45	1123	ERE
AhFBX45	1168	STRE
AhFBX45	1195	G-box
AhFBX45	1196	ABRE
AhFBX45	1202	TCA-element
AhFBX45	1225	AAGAA-motif
AhFBX45	1270	MBS
AhFBX45	1270	MYB
AhFBX45	1354	MBS
AhFBX45	1354	MYB
AhFBX45	1408	MYB
AhFBX45	1408	MYB
AhFBX45	1420	ARE
AhFBX45	1433	ARE
AhFBX45	1541	STRE
AhFBX45	1608	MYC
AhFBX45	1704	GATA-motif
AhFBX45	1780	ARE
AhFBX45	1839	Box-4
AhFBX45	1879	AAGAA-motif
AhFBX45	1955	MYB
AhFBX46	5	Box-4
AhFBX46	61	ARE
AhFBX46	75	ERE
AhFBX46	187	MYB
AhFBX46	191	MYB
AhFBX46	197	MYB
AhFBX46	235	G-box
AhFBX46	236	ABRE
AhFBX46	313	ERE
AhFBX46	320	WUN-motif
AhFBX46	396	ERE
AhFBX46	614	Box-4
AhFBX46	640	MYB
AhFBX46	640	MYB
AhFBX46	689	ERE
AhFBX46	695	ERE
AhFBX46	697	ERE
AhFBX46	850	AAGAA-motif
AhFBX46	861	LTR
AhFBX46	1072	TGACG-motif
AhFBX46	1072	as-1
AhFBX46	1072	CGTCA-motif
AhFBX46	1104	TGACG-motif
AhFBX46	1104	as-1
AhFBX46	1104	CGTCA-motif
AhFBX46	1160	TGACG-motif
AhFBX46	1160	as-1
AhFBX46	1160	CGTCA-motif
AhFBX46	1167	G-box
AhFBX46	1168	ABRE
AhFBX46	1209	ABRE
AhFBX46	1209	ABRE
AhFBX46	1209	ABRE
AhFBX46	1209	G-box
AhFBX46	1372	TGACG-motif
AhFBX46	1372	as-1
AhFBX46	1372	CGTCA-motif
AhFBX46	1384	MYB
AhFBX46	1393	MYB
AhFBX46	1393	MYB
AhFBX46	1484	MYC
AhFBX46	1546	ABRE
AhFBX46	1546	G-box
AhFBX46	1546	G-box
AhFBX46	1547	ABRE
AhFBX46	1704	W-box
AhFBX46	1772	MYC
AhFBX46	1959	Box-4
AhFBX46	1967	MYB
AhFBX46	1967	MBS
AhFBX47	146	MYC
AhFBX47	161	TGACG-motif
AhFBX47	161	CGTCA-motif
AhFBX47	161	as-1
AhFBX47	258	LTR
AhFBX47	353	STRE
AhFBX47	517	STRE
AhFBX47	574	TGACG-motif
AhFBX47	574	CGTCA-motif
AhFBX47	574	as-1
AhFBX47	577	MYC
AhFBX47	619	MYC
AhFBX47	633	LTR
AhFBX47	742	LTR
AhFBX47	928	Box-4
AhFBX47	979	Box-4
AhFBX47	1032	AAGAA-motif
AhFBX47	1038	STRE
AhFBX47	1076	TGACG-motif
AhFBX47	1076	CGTCA-motif
AhFBX47	1076	as-1
AhFBX47	1077	G-box
AhFBX47	1078	ABRE
AhFBX47	1091	MYB
AhFBX47	1135	STRE
AhFBX47	1266	Box-4
AhFBX47	1518	Box-4
AhFBX47	1543	GT1-motif
AhFBX47	1673	LTR
AhFBX47	1686	TCT-motif
AhFBX47	1807	MYC
AhFBX47	1827	TCA-element
AhFBX47	1894	ARE
AhFBX47	1943	MYB
AhFBX47	1943	MYB
AhFBX47	1944	GT1-motif
AhFBX48	65	AAGAA-motif
AhFBX48	69	AAGAA-motif
AhFBX48	198	AAGAA-motif
AhFBX48	205	AAGAA-motif
AhFBX48	244	STRE
AhFBX48	265	G-box
AhFBX48	266	ABRE
AhFBX48	310	MYC
AhFBX48	344	MYC
AhFBX48	380	G-box
AhFBX48	380	ABRE
AhFBX48	466	STRE
AhFBX48	485	CGTCA-motif
AhFBX48	485	as-1
AhFBX48	485	TGACG-motif
AhFBX48	604	MYB
AhFBX48	610	STRE
AhFBX48	708	MYB
AhFBX48	708	MYB
AhFBX48	783	GT1-motif
AhFBX48	787	STRE
AhFBX48	934	Box-4
AhFBX48	1004	CGTCA-motif
AhFBX48	1004	as-1
AhFBX48	1004	TGACG-motif
AhFBX48	1029	ERE
AhFBX48	1053	ERE
AhFBX48	1242	Box-4
AhFBX48	1349	GT1-motif
AhFBX48	1477	TCT-motif
AhFBX48	1523	MYC
AhFBX48	1618	MYB
AhFBX48	1690	MYC
AhFBX48	1732	CGTCA-motif
AhFBX48	1732	as-1
AhFBX48	1732	TGACG-motif
AhFBX48	1788	MYB
AhFBX48	1791	MYB
AhFBX48	1791	MYB
AhFBX48	1821	MYB
AhFBX48	1826	AAGAA-motif
AhFBX48	1841	MYB
AhFBX48	1873	TCT-motif
AhFBX49	144	G-box
AhFBX49	145	ABRE
AhFBX49	219	ERE
AhFBX49	238	Box-4
AhFBX49	259	Box-4
AhFBX49	317	ERE
AhFBX49	349	ERE
AhFBX49	427	STRE
AhFBX49	472	MYC
AhFBX49	872	MYC
AhFBX49	1096	STRE
AhFBX49	1224	TCA-element
AhFBX49	1394	MYB
AhFBX49	1394	MYB
AhFBX49	1395	GT1-motif
AhFBX49	1413	ARE
AhFBX49	1489	MBS
AhFBX49	1489	MYB
AhFBX49	1567	LTR
AhFBX49	1627	MYB
AhFBX49	1641	MYB
AhFBX49	1748	TCA-element
AhFBX49	1766	TCA-element
AhFBX49	1772	TCA-element
AhFBX49	1775	TCA-element
AhFBX49	1976	ABRE
AhFBX49	1976	G-box
AhFBX50	1	STRE
AhFBX50	218	LTR
AhFBX50	243	STRE
AhFBX50	329	GT1-motif
AhFBX50	330	MYB
AhFBX50	330	MYB
AhFBX50	372	MYB
AhFBX50	907	Box-4
AhFBX50	1081	WUN-motif
AhFBX50	1172	Box-4
AhFBX50	1260	ABRE
AhFBX50	1260	G-box
AhFBX50	1262	TGACG-motif
AhFBX50	1262	as-1
AhFBX50	1262	CGTCA-motif
AhFBX50	1328	MYB
AhFBX50	1342	ERE
AhFBX50	1360	Box-4
AhFBX50	1449	TGACG-motif
AhFBX50	1449	as-1
AhFBX50	1449	CGTCA-motif
AhFBX50	1538	Box-4
AhFBX50	1564	MYC
AhFBX50	1629	TCA-element
AhFBX50	1700	ERE
AhFBX50	1779	G-box
AhFBX50	1779	ABRE
AhFBX50	1792	ERE
AhFBX50	1798	Box-4
AhFBX50	1885	Box-4
AhFBX50	1889	Box-4
AhFBX50	1933	MYB
AhFBX50	1933	MYB
AhFBX50	1982	STRE
AhFBX50	1987	STRE
AhFBX51	32	AAGAA-motif
AhFBX51	34	AAGAA-motif
AhFBX51	91	AAGAA-motif
AhFBX51	139	MYC
AhFBX51	203	LTR
AhFBX51	213	as-1
AhFBX51	213	CGTCA-motif
AhFBX51	213	TGACG-motif
AhFBX51	281	MYB
AhFBX51	281	MYB
AhFBX51	304	ABRE
AhFBX51	310	LTR
AhFBX51	351	MYB
AhFBX51	351	MYB
AhFBX51	371	GT1-motif
AhFBX51	372	MYB
AhFBX51	372	MYB
AhFBX51	459	as-1
AhFBX51	459	CGTCA-motif
AhFBX51	459	TGACG-motif
AhFBX51	576	Box-4
AhFBX51	635	LTR
AhFBX51	736	TCT-motif
AhFBX51	894	LTR
AhFBX51	935	MYC
AhFBX51	1060	MYB
AhFBX51	1116	MYC
AhFBX51	1170	ERE
AhFBX51	1329	MYC
AhFBX51	1381	MYB
AhFBX51	1620	GATA-motif
AhFBX51	1711	TCA-element
AhFBX51	1717	STRE
AhFBX51	1752	MYB
AhFBX51	1794	G-box
AhFBX51	1795	G-box
AhFBX51	1796	ABRE
AhFBX51	1862	Box-4
AhFBX51	1919	MYC
AhFBX52	34	ARE
AhFBX52	84	GT1-motif
AhFBX52	148	GATA-motif
AhFBX52	189	ERE
AhFBX52	209	AAGAA-motif
AhFBX52	230	ARE
AhFBX52	454	MYB
AhFBX52	454	MYB
AhFBX52	579	ARE
AhFBX52	618	CGTCA-motif
AhFBX52	618	as-1
AhFBX52	618	TGACG-motif
AhFBX52	798	W-box
AhFBX52	837	MYC
AhFBX52	962	GT1-motif
AhFBX52	1152	ERE
AhFBX52	1196	CGTCA-motif
AhFBX52	1196	as-1
AhFBX52	1196	TGACG-motif
AhFBX52	1220	G-box
AhFBX52	1221	ABRE
AhFBX52	1291	MYB
AhFBX52	1355	WUN-motif
AhFBX52	1362	MYB
AhFBX52	1362	MYB
AhFBX52	1462	AAGAA-motif
AhFBX52	1483	AAGAA-motif
AhFBX52	1803	STRE
AhFBX52	1806	W-box
AhFBX52	1875	ARE
AhFBX52	1923	MYC
AhFBX53	71	LTR
AhFBX53	93	LTR
AhFBX53	101	MYC
AhFBX53	123	MYC
AhFBX53	127	as-1
AhFBX53	127	CGTCA-motif
AhFBX53	127	TGACG-motif
AhFBX53	204	MYC
AhFBX53	257	MYB
AhFBX53	291	MYC
AhFBX53	335	W-box
AhFBX53	387	MYC
AhFBX53	493	MYC
AhFBX53	530	W-box
AhFBX53	565	Box-4
AhFBX53	574	MYC
AhFBX53	582	LTR
AhFBX53	692	LTR
AhFBX53	695	WUN-motif
AhFBX53	720	W-box
AhFBX53	755	Box-4
AhFBX53	764	MYC
AhFBX53	772	LTR
AhFBX53	850	MYC
AhFBX53	891	MYB
AhFBX53	891	MYB
AhFBX53	911	as-1
AhFBX53	911	CGTCA-motif
AhFBX53	911	TGACG-motif
AhFBX53	1137	MYB
AhFBX53	1701	ERE
AhFBX53	1795	ERE
AhFBX53	1881	ERE
AhFBX53	1978	ARE
AhFBX54	1	STRE
AhFBX54	4	STRE
AhFBX54	18	STRE
AhFBX54	31	STRE
AhFBX54	52	ABRE
AhFBX54	52	G-box
AhFBX54	62	STRE
AhFBX54	85	ABRE
AhFBX54	85	G-box
AhFBX54	101	STRE
AhFBX54	131	STRE
AhFBX54	138	STRE
AhFBX54	145	STRE
AhFBX54	151	STRE
AhFBX54	157	STRE
AhFBX54	164	STRE
AhFBX54	176	STRE
AhFBX54	268	LTR
AhFBX54	305	ERE
AhFBX54	307	ERE
AhFBX54	384	TGACG-motif
AhFBX54	384	as-1
AhFBX54	384	CGTCA-motif
AhFBX54	704	MYB
AhFBX54	704	MBS
AhFBX54	715	TCA-element
AhFBX54	726	MYC
AhFBX54	779	LTR
AhFBX54	927	G-box
AhFBX54	929	ABRE
AhFBX54	929	G-box
AhFBX54	929	G-box
AhFBX54	930	ABRE
AhFBX54	954	ARE
AhFBX54	1084	MYC
AhFBX54	1117	MYC
AhFBX54	1187	WUN-motif
AhFBX54	1220	MYC
AhFBX54	1237	MYB
AhFBX54	1237	MBS
AhFBX54	1277	TCT-motif
AhFBX54	1290	MYB
AhFBX54	1290	MBS
AhFBX54	1414	ERE
AhFBX54	1447	TGACG-motif
AhFBX54	1447	as-1
AhFBX54	1447	CGTCA-motif
AhFBX54	1460	W-box
AhFBX54	1471	MYB
AhFBX54	1471	MYB
AhFBX54	1678	AAGAA-motif
AhFBX54	1848	MYB
AhFBX54	1885	MYC
AhFBX54	1942	MYB
AhFBX54	1942	MYB
AhFBX54	1945	MYB
AhFBX55	142	MYB
AhFBX55	254	TCA-element
AhFBX55	280	MYC
AhFBX55	309	MYC
AhFBX55	541	G-box
AhFBX55	541	ABRE
AhFBX55	628	CGTCA-motif
AhFBX55	628	TGACG-motif
AhFBX55	628	as-1
AhFBX55	629	G-box
AhFBX55	630	ABRE
AhFBX55	633	MYB
AhFBX55	692	STRE
AhFBX55	705	TCT-motif
AhFBX55	783	MYC
AhFBX55	1081	MBS
AhFBX55	1081	MYB
AhFBX55	1106	ARE
AhFBX55	1210	MYC
AhFBX55	1244	MYB
AhFBX55	1255	WUN-motif
AhFBX55	1260	TCT-motif
AhFBX55	1431	MYC
AhFBX55	1497	MYB
AhFBX55	1497	MYB
AhFBX55	1639	WUN-motif
AhFBX55	1792	TCA-element
AhFBX55	1905	MYB
AhFBX55	1929	MYB
AhFBX55	1943	MBS
AhFBX55	1943	MYB
AhFBX56	21	ABRE
AhFBX56	21	G-box
AhFBX56	52	W-box
AhFBX56	109	Box-4
AhFBX56	272	ABRE
AhFBX56	272	ABRE
AhFBX56	272	G-box
AhFBX56	272	ABRE
AhFBX56	289	MYB
AhFBX56	289	MYB
AhFBX56	313	ABRE
AhFBX56	313	ABRE
AhFBX56	313	G-box
AhFBX56	313	ABRE
AhFBX56	333	TCA-element
AhFBX56	358	ARE
AhFBX56	403	ERE
AhFBX56	419	MYB
AhFBX56	419	MYB
AhFBX56	466	MYC
AhFBX56	571	STRE
AhFBX56	607	Box-4
AhFBX56	704	TCA-element
AhFBX56	726	MYC
AhFBX56	858	MYC
AhFBX56	895	MYC
AhFBX56	1055	MYB
AhFBX56	1055	MYB
AhFBX56	1075	Box-4
AhFBX56	1253	ARE
AhFBX56	1304	WUN-motif
AhFBX56	1384	STRE
AhFBX56	1444	MYC
AhFBX56	1448	TGACG-motif
AhFBX56	1448	as-1
AhFBX56	1448	CGTCA-motif
AhFBX56	1492	MYB
AhFBX56	1492	MYB
AhFBX56	1506	MYB
AhFBX56	1611	ABRE
AhFBX56	1611	G-box
AhFBX56	1663	WUN-motif
AhFBX56	1687	ERE
AhFBX56	1734	STRE
AhFBX56	1839	MYB
AhFBX56	1865	G-box
AhFBX56	1866	ABRE
AhFBX56	1907	MYB
AhFBX56	1907	MYB
AhFBX56	1927	STRE
AhFBX57	31	ERE
AhFBX57	98	Box-4
AhFBX57	119	TCA-element
AhFBX57	321	Box-4
AhFBX57	368	ERE
AhFBX57	464	AAGAA-motif
AhFBX57	574	MYC
AhFBX57	674	GATA-motif
AhFBX57	696	MYB
AhFBX57	696	MYB
[truncated: 1,535 more rows]

## Sheet: S5
Chromosome	Gene ID		Chromosome	Gene ID
Chr.02	arahy.Tifrunner.gnm1.ann1.6LM7DE.1	==	A02	aradu.V14167.gnm1.ann1.Aradu.BZL5X.1
Chr.03	arahy.Tifrunner.gnm1.ann1.U37KZ8.1	==	A03	aradu.V14167.gnm1.ann1.Aradu.WC0YR.1
Chr.03	arahy.Tifrunner.gnm1.ann1.2I2XLP.1	==	A03	aradu.V14167.gnm1.ann1.Aradu.1F5AZ.1
Chr.03	arahy.Tifrunner.gnm1.ann1.2I2XLP.1	==	A10	aradu.V14167.gnm1.ann1.Aradu.Q0L09.1
Chr.04	arahy.Tifrunner.gnm1.ann1.A26VA3.1	==	A04	aradu.V14167.gnm1.ann1.Aradu.DH725.1
Chr.04	arahy.Tifrunner.gnm1.ann1.8IRE12.1	==	A04	aradu.V14167.gnm1.ann1.Aradu.224D3.1
Chr.04	arahy.Tifrunner.gnm1.ann1.KD9PJ3.1	==	A04	aradu.V14167.gnm1.ann1.Aradu.XB89Z.1
Chr.04	arahy.Tifrunner.gnm1.ann1.3QCW2V.1	==	A04	aradu.V14167.gnm1.ann1.Aradu.CL87R.1
Chr.04	arahy.Tifrunner.gnm1.ann1.AE1TV9.1	==	A04	aradu.V14167.gnm1.ann1.Aradu.1AY41.1
Chr.04	arahy.Tifrunner.gnm1.ann1.09C040.1	==	A04	aradu.V14167.gnm1.ann1.Aradu.EW2BZ.1
Chr.04	arahy.Tifrunner.gnm1.ann1.MMWN9B.1	==	A04	aradu.V14167.gnm1.ann1.Aradu.3D0J6.1
Chr.04	arahy.Tifrunner.gnm1.ann1.7LAG9G.1	==	A04	aradu.V14167.gnm1.ann1.Aradu.JXM0I.1
Chr.04	arahy.Tifrunner.gnm1.ann1.8CD6MN.1	==	A04	aradu.V14167.gnm1.ann1.Aradu.V44AX.1
Chr.04	arahy.Tifrunner.gnm1.ann1.A0TG2R.1	==	A04	aradu.V14167.gnm1.ann1.Aradu.FPP6R.1
Chr.04	arahy.Tifrunner.gnm1.ann1.EFML97.1	==	A04	aradu.V14167.gnm1.ann1.Aradu.6L2YS.1
Chr.04	arahy.Tifrunner.gnm1.ann1.X0G52T.1	==	A04	aradu.V14167.gnm1.ann1.Aradu.HY4GA.1
Chr.04	arahy.Tifrunner.gnm1.ann1.LFQ4L6.1	==	A04	aradu.V14167.gnm1.ann1.Aradu.IF5M8.1
Chr.05	arahy.Tifrunner.gnm1.ann1.DNVT9B.1	==	A05	aradu.V14167.gnm1.ann1.Aradu.C665I.1
Chr.05	arahy.Tifrunner.gnm1.ann1.AXI81X.1	==	A05	aradu.V14167.gnm1.ann1.Aradu.7H8MA.1
Chr.06	arahy.Tifrunner.gnm1.ann1.U0A6F2.1	==	A06	aradu.V14167.gnm1.ann1.Aradu.G6132.1
Chr.06	arahy.Tifrunner.gnm1.ann1.49J1TU.1	==	A06	aradu.V14167.gnm1.ann1.Aradu.X8GPB.1
Chr.06	arahy.Tifrunner.gnm1.ann1.4JU4D9.1	==	A06	aradu.V14167.gnm1.ann1.Aradu.N7PTR.1
Chr.06	arahy.Tifrunner.gnm1.ann1.4JU4D9.1	==	A10	aradu.V14167.gnm1.ann1.Aradu.60FFJ.1
Chr.08	arahy.Tifrunner.gnm1.ann1.W8H4W4.1	==	A08	aradu.V14167.gnm1.ann1.Aradu.8G40J.1
Chr.08	arahy.Tifrunner.gnm1.ann1.W8H4W4.1	==	A10	aradu.V14167.gnm1.ann1.Aradu.YZ2KU.1
Chr.09	arahy.Tifrunner.gnm1.ann1.ELS2X1.1	==	A09	aradu.V14167.gnm1.ann1.Aradu.U01GP.1
Chr.09	arahy.Tifrunner.gnm1.ann1.58PES0.1	==	A09	aradu.V14167.gnm1.ann1.Aradu.39CFF.1
Chr.09	arahy.Tifrunner.gnm1.ann1.TWR7CT.1	==	A09	aradu.V14167.gnm1.ann1.Aradu.E1H3W.1
Chr.09	arahy.Tifrunner.gnm1.ann1.U952AB.1	==	A09	aradu.V14167.gnm1.ann1.Aradu.H3QTB.1
Chr.09	arahy.Tifrunner.gnm1.ann1.TE0DUK.1	==	A09	aradu.V14167.gnm1.ann1.Aradu.ZH02M.1
Chr.09	arahy.Tifrunner.gnm1.ann1.SML81V.1	==	A09	aradu.V14167.gnm1.ann1.Aradu.GP6HQ.1
Chr.09	arahy.Tifrunner.gnm1.ann1.693WQ9.1	==	A09	aradu.V14167.gnm1.ann1.Aradu.QZD25.1
Chr.10	arahy.Tifrunner.gnm1.ann1.9W7Z3M.1	==	A08	aradu.V14167.gnm1.ann1.Aradu.8G40J.1
Chr.10	arahy.Tifrunner.gnm1.ann1.9W7Z3M.1	==	A10	aradu.V14167.gnm1.ann1.Aradu.YZ2KU.1
Chr.10	arahy.Tifrunner.gnm1.ann1.K2HCDK.1	==	A10	aradu.V14167.gnm1.ann1.Aradu.N7MUQ.1
Chr.11	arahy.Tifrunner.gnm1.ann1.JKK1Y1.1	==	A01	aradu.V14167.gnm1.ann1.Aradu.HNV5C.1
Chr.12	arahy.Tifrunner.gnm1.ann1.8FUA72.1	==	A02	aradu.V14167.gnm1.ann1.Aradu.BZL5X.1
Chr.13	arahy.Tifrunner.gnm1.ann1.W71BFG.1	==	A03	aradu.V14167.gnm1.ann1.Aradu.1F5AZ.1
Chr.13	arahy.Tifrunner.gnm1.ann1.8GYA0C.1	==	A03	aradu.V14167.gnm1.ann1.Aradu.SJ15T.1
Chr.14	arahy.Tifrunner.gnm1.ann1.FL9AGG.1	==	A04	aradu.V14167.gnm1.ann1.Aradu.DH725.1
Chr.14	arahy.Tifrunner.gnm1.ann1.LPT1V0.1	==	A04	aradu.V14167.gnm1.ann1.Aradu.6L2YS.1
Chr.14	arahy.Tifrunner.gnm1.ann1.FJK5PX.1	==	A04	aradu.V14167.gnm1.ann1.Aradu.1AY41.1
Chr.14	arahy.Tifrunner.gnm1.ann1.MAM16D.1	==	A04	aradu.V14167.gnm1.ann1.Aradu.EW2BZ.1
Chr.14	arahy.Tifrunner.gnm1.ann1.M84CU1.1	==	A04	aradu.V14167.gnm1.ann1.Aradu.3D0J6.1
Chr.14	arahy.Tifrunner.gnm1.ann1.S178WR.1	==	A04	aradu.V14167.gnm1.ann1.Aradu.JXM0I.1
Chr.14	arahy.Tifrunner.gnm1.ann1.68D2LB.1	==	A04	aradu.V14167.gnm1.ann1.Aradu.98P27.1
Chr.14	arahy.Tifrunner.gnm1.ann1.LPT1V0.1	==	A04	aradu.V14167.gnm1.ann1.Aradu.V44AX.1
Chr.14	arahy.Tifrunner.gnm1.ann1.YA6NJH.1	==	A04	aradu.V14167.gnm1.ann1.Aradu.FPP6R.1
Chr.14	arahy.Tifrunner.gnm1.ann1.4I2C1H.1	==	A04	aradu.V14167.gnm1.ann1.Aradu.CF5Z2.1
Chr.14	arahy.Tifrunner.gnm1.ann1.AEIW8D.1	==	A04	aradu.V14167.gnm1.ann1.Aradu.6L2YS.1
Chr.14	arahy.Tifrunner.gnm1.ann1.II1KZ3.1	==	A04	aradu.V14167.gnm1.ann1.Aradu.HY4GA.1
Chr.14	arahy.Tifrunner.gnm1.ann1.LXV8AN.1	==	A04	aradu.V14167.gnm1.ann1.Aradu.IF5M8.1
Chr.14	arahy.Tifrunner.gnm1.ann1.68D2LB.1	==	A04	aradu.V14167.gnm1.ann1.Aradu.EW2BZ.1
Chr.14	arahy.Tifrunner.gnm1.ann1.BNH673.1	==	A04	aradu.V14167.gnm1.ann1.Aradu.JXM0I.1
Chr.14	arahy.Tifrunner.gnm1.ann1.BNH673.1	==	A04	aradu.V14167.gnm1.ann1.Aradu.V4H98.1
Chr.14	arahy.Tifrunner.gnm1.ann1.II1KZ3.1	==	A04	aradu.V14167.gnm1.ann1.Aradu.AI61T.1
Chr.14	arahy.Tifrunner.gnm1.ann1.YA6NJH.1	==	A04	aradu.V14167.gnm1.ann1.Aradu.1AY41.1
Chr.14	arahy.Tifrunner.gnm1.ann1.LPT1V0.1	==	A04	aradu.V14167.gnm1.ann1.Aradu.F95E7.1
Chr.15	arahy.Tifrunner.gnm1.ann1.RIMI91.1	==	A05	aradu.V14167.gnm1.ann1.Aradu.7H8MA.1
Chr.15	arahy.Tifrunner.gnm1.ann1.UIW2EQ.1	==	A05	aradu.V14167.gnm1.ann1.Aradu.C665I.1
Chr.17	arahy.Tifrunner.gnm1.ann1.YYE7NP.1	==	A08	aradu.V14167.gnm1.ann1.Aradu.8G40J.1
Chr.17	arahy.Tifrunner.gnm1.ann1.YYE7NP.1	==	A10	aradu.V14167.gnm1.ann1.Aradu.YZ2KU.1
Chr.17	arahy.Tifrunner.gnm1.ann1.DJE5AQ.1	==	A10	aradu.V14167.gnm1.ann1.Aradu.8I7SF.1
Chr.19	arahy.Tifrunner.gnm1.ann1.3Z8CKB.1	==	A02	aradu.V14167.gnm1.ann1.Aradu.4WL2W.1
Chr.19	arahy.Tifrunner.gnm1.ann1.5FA8WQ.1	==	A09	aradu.V14167.gnm1.ann1.Aradu.579X4.1
Chr.19	arahy.Tifrunner.gnm1.ann1.SVZ6B5.1	==	A09	aradu.V14167.gnm1.ann1.Aradu.E1H3W.1
Chr.19	arahy.Tifrunner.gnm1.ann1.XH3FAH.1	==	A09	aradu.V14167.gnm1.ann1.Aradu.H3QTB.1
Chr.19	arahy.Tifrunner.gnm1.ann1.PRFE0Z.1	==	A09	aradu.V14167.gnm1.ann1.Aradu.ZH02M.1
Chr.19	arahy.Tifrunner.gnm1.ann1.CSTZ0U.1	==	A09	aradu.V14167.gnm1.ann1.Aradu.5Q7U7.1
Chr.19	arahy.Tifrunner.gnm1.ann1.YXHH77.1	==	A09	aradu.V14167.gnm1.ann1.Aradu.Z6FTT.1
Chr.19	arahy.Tifrunner.gnm1.ann1.KU1CJZ.1	==	A09	aradu.V14167.gnm1.ann1.Aradu.GP6HQ.1
Chr.19	arahy.Tifrunner.gnm1.ann1.NJ4UUV.1	==	A09	aradu.V14167.gnm1.ann1.Aradu.HKL1A.1
Chr.19	arahy.Tifrunner.gnm1.ann1.CIN5QE.1	==	A09	aradu.V14167.gnm1.ann1.Aradu.QZD25.1
Chr.19	arahy.Tifrunner.gnm1.ann1.RJB6DE.1	==	A09	aradu.V14167.gnm1.ann1.Aradu.U01GP.1
Chr.20	arahy.Tifrunner.gnm1.ann1.W5GG00.1	==	A10	aradu.V14167.gnm1.ann1.Aradu.N7MUQ.1
Chr.02	arahy.Tifrunner.gnm1.ann1.I0AFD1.1	==	B02	araip.K30076.gnm1.ann1.Araip.1E7AR.1
Chr.02	arahy.Tifrunner.gnm1.ann1.6LM7DE.1	==	B02	araip.K30076.gnm1.ann1.Araip.4G0H6.1
Chr.03	arahy.Tifrunner.gnm1.ann1.2I2XLP.1	==	B03	araip.K30076.gnm1.ann1.Araip.A0U1I.1
Chr.03	arahy.Tifrunner.gnm1.ann1.2I2XLP.1	==	B10	araip.K30076.gnm1.ann1.Araip.5F8XF.1
Chr.04	arahy.Tifrunner.gnm1.ann1.A26VA3.1	==	B02	araip.K30076.gnm1.ann1.Araip.BT19G.1
Chr.04	arahy.Tifrunner.gnm1.ann1.8IRE12.1	==	B04	araip.K30076.gnm1.ann1.Araip.61AXJ.1
Chr.04	arahy.Tifrunner.gnm1.ann1.AE1TV9.1	==	B04	araip.K30076.gnm1.ann1.Araip.9AH0U.1
Chr.04	arahy.Tifrunner.gnm1.ann1.X0G52T.1	==	B04	araip.K30076.gnm1.ann1.Araip.8TQ2K.1
Chr.04	arahy.Tifrunner.gnm1.ann1.7LAG9G.1	==	B04	araip.K30076.gnm1.ann1.Araip.NZ9YG.1
Chr.04	arahy.Tifrunner.gnm1.ann1.SLE2S5.1	==	B04	araip.K30076.gnm1.ann1.Araip.BJH1X.1
Chr.04	arahy.Tifrunner.gnm1.ann1.A26VA3.1	==	B04	araip.K30076.gnm1.ann1.Araip.MGZ7D.1
Chr.04	arahy.Tifrunner.gnm1.ann1.8CD6MN.1	==	B04	araip.K30076.gnm1.ann1.Araip.M9UJZ.1
Chr.04	arahy.Tifrunner.gnm1.ann1.MMWN9B.1	==	B04	araip.K30076.gnm1.ann1.Araip.Y0Y99.1
Chr.05	arahy.Tifrunner.gnm1.ann1.DNVT9B.1	==	B05	araip.K30076.gnm1.ann1.Araip.4J570.1
Chr.05	arahy.Tifrunner.gnm1.ann1.AXI81X.1	==	B05	araip.K30076.gnm1.ann1.Araip.30QVU.1
Chr.05	arahy.Tifrunner.gnm1.ann1.AXI81X.1	==	B09	araip.K30076.gnm1.ann1.Araip.6B2F0.1
Chr.06	arahy.Tifrunner.gnm1.ann1.49J1TU.1	==	B06	araip.K30076.gnm1.ann1.Araip.26EKA.1
Chr.06	arahy.Tifrunner.gnm1.ann1.U0A6F2.1	==	B06	araip.K30076.gnm1.ann1.Araip.W8S6H.1
Chr.08	arahy.Tifrunner.gnm1.ann1.W8H4W4.1	==	B07	araip.K30076.gnm1.ann1.Araip.Y1R86.1
Chr.09	arahy.Tifrunner.gnm1.ann1.693WQ9.1	==	B06	araip.K30076.gnm1.ann1.Araip.IN97X.1
Chr.09	arahy.Tifrunner.gnm1.ann1.58PES0.1	==	B09	araip.K30076.gnm1.ann1.Araip.I8JAN.1
Chr.09	arahy.Tifrunner.gnm1.ann1.KT489S.1	==	B09	araip.K30076.gnm1.ann1.Araip.QUS0K.1
Chr.09	arahy.Tifrunner.gnm1.ann1.TWR7CT.1	==	B09	araip.K30076.gnm1.ann1.Araip.BLM48.1
Chr.09	arahy.Tifrunner.gnm1.ann1.U952AB.1	==	B09	araip.K30076.gnm1.ann1.Araip.ZB1UD.1
Chr.09	arahy.Tifrunner.gnm1.ann1.SML81V.1	==	B09	araip.K30076.gnm1.ann1.Araip.85R0G.1
Chr.09	arahy.Tifrunner.gnm1.ann1.693WQ9.1	==	B09	araip.K30076.gnm1.ann1.Araip.7D96E.1
Chr.09	arahy.Tifrunner.gnm1.ann1.ELS2X1.1	==	B09	araip.K30076.gnm1.ann1.Araip.543RJ.1
Chr.10	arahy.Tifrunner.gnm1.ann1.9W7Z3M.1	==	B07	araip.K30076.gnm1.ann1.Araip.Y1R86.1
Chr.10	arahy.Tifrunner.gnm1.ann1.K2HCDK.1	==	B10	araip.K30076.gnm1.ann1.Araip.9RR7M.1
Chr.11	arahy.Tifrunner.gnm1.ann1.JKK1Y1.1	==	B01	araip.K30076.gnm1.ann1.Araip.LEK47.1
Chr.12	arahy.Tifrunner.gnm1.ann1.8FUA72.1	==	B02	araip.K30076.gnm1.ann1.Araip.4G0H6.1
Chr.13	arahy.Tifrunner.gnm1.ann1.W71BFG.1	==	B03	araip.K30076.gnm1.ann1.Araip.A0U1I.1
Chr.13	arahy.Tifrunner.gnm1.ann1.8GYA0C.1	==	B03	araip.K30076.gnm1.ann1.Araip.NK3C5.1
Chr.13	arahy.Tifrunner.gnm1.ann1.W71BFG.1	==	B10	araip.K30076.gnm1.ann1.Araip.5F8XF.1
Chr.14	arahy.Tifrunner.gnm1.ann1.FL9AGG.1	==	B02	araip.K30076.gnm1.ann1.Araip.BT19G.1
Chr.14	arahy.Tifrunner.gnm1.ann1.ZT59C6.1	==	B04	araip.K30076.gnm1.ann1.Araip.3N6B2.1
Chr.14	arahy.Tifrunner.gnm1.ann1.FJK5PX.1	==	B04	araip.K30076.gnm1.ann1.Araip.9AH0U.1
Chr.14	arahy.Tifrunner.gnm1.ann1.II1KZ3.1	==	B04	araip.K30076.gnm1.ann1.Araip.8TQ2K.1
Chr.14	arahy.Tifrunner.gnm1.ann1.S178WR.1	==	B04	araip.K30076.gnm1.ann1.Araip.NZ9YG.1
Chr.14	arahy.Tifrunner.gnm1.ann1.BNH673.1	==	B04	araip.K30076.gnm1.ann1.Araip.BJH1X.1
Chr.14	arahy.Tifrunner.gnm1.ann1.FL9AGG.1	==	B04	araip.K30076.gnm1.ann1.Araip.MGZ7D.1
Chr.15	arahy.Tifrunner.gnm1.ann1.UIW2EQ.1	==	B05	araip.K30076.gnm1.ann1.Araip.4J570.1
Chr.15	arahy.Tifrunner.gnm1.ann1.RIMI91.1	==	B05	araip.K30076.gnm1.ann1.Araip.30QVU.1
Chr.15	arahy.Tifrunner.gnm1.ann1.RIMI91.1	==	B09	araip.K30076.gnm1.ann1.Araip.6B2F0.1
Chr.16	arahy.Tifrunner.gnm1.ann1.DC671X.1	==	B06	araip.K30076.gnm1.ann1.Araip.S8P9Z.1
Chr.17	arahy.Tifrunner.gnm1.ann1.YYE7NP.1	==	B07	araip.K30076.gnm1.ann1.Araip.Y1R86.1
Chr.19	arahy.Tifrunner.gnm1.ann1.CIN5QE.1	==	B06	araip.K30076.gnm1.ann1.Araip.IN97X.1
Chr.19	arahy.Tifrunner.gnm1.ann1.RJB6DE.1	==	B09	araip.K30076.gnm1.ann1.Araip.543RJ.1
Chr.19	arahy.Tifrunner.gnm1.ann1.3Z8CKB.1	==	B09	araip.K30076.gnm1.ann1.Araip.M7ZAE.1
Chr.19	arahy.Tifrunner.gnm1.ann1.5FA8WQ.1	==	B09	araip.K30076.gnm1.ann1.Araip.D014N.1
Chr.19	arahy.Tifrunner.gnm1.ann1.SVZ6B5.1	==	B09	araip.K30076.gnm1.ann1.Araip.BLM48.1
Chr.19	arahy.Tifrunner.gnm1.ann1.XH3FAH.1	==	B09	araip.K30076.gnm1.ann1.Araip.ZB1UD.1
Chr.19	arahy.Tifrunner.gnm1.ann1.CSTZ0U.1	==	B09	araip.K30076.gnm1.ann1.Araip.SS8AF.1
Chr.19	arahy.Tifrunner.gnm1.ann1.KU1CJZ.1	==	B09	araip.K30076.gnm1.ann1.Araip.85R0G.1
Chr.19	arahy.Tifrunner.gnm1.ann1.NJ4UUV.1	==	B09	araip.K30076.gnm1.ann1.Araip.WE8XB.1
Chr.19	arahy.Tifrunner.gnm1.ann1.CIN5QE.1	==	B09	araip.K30076.gnm1.ann1.Araip.7D96E.1
Chr.19	arahy.Tifrunner.gnm1.ann1.X1Z13X.1	==	B09	araip.K30076.gnm1.ann1.Araip.15PP1.1
Chr.20	arahy.Tifrunner.gnm1.ann1.W5GG00.1	==	B10	araip.K30076.gnm1.ann1.Araip.9RR7M.1

## Sheet: S6
Gene ID	Gene location	Gene ID	Gene location
arahy.Tifrunner.gnm1.ann1.8FUA72	Arahy.12：6873201-6877417	arahy.Tifrunner.gnm1.ann1.6LM7DE	Arahy.02：5426833-5429927
arahy.Tifrunner.gnm1.ann1.W71BFG	Arahy.13：144809642-144813539	arahy.Tifrunner.gnm1.ann1.2I2XLP	Arahy.03：141833907-141836791
arahy.Tifrunner.gnm1.ann1.K4WWU7	Arahy.13：126025211-126026431	arahy.Tifrunner.gnm1.ann1.FB190S	Arahy.03：122940137-122941357
arahy.Tifrunner.gnm1.ann1.LPT1V0	Arahy.14：140589158-140591261	arahy.Tifrunner.gnm1.ann1.8CD6MN	Arahy.04：126153628-126155731
arahy.Tifrunner.gnm1.ann1.FJK5PX	Arahy.14：140676485-140681022	arahy.Tifrunner.gnm1.ann1.AE1TV9	Arahy.04：126240955-126245492
arahy.Tifrunner.gnm1.ann1.AEIW8D	Arahy.14：140705453-140711064	arahy.Tifrunner.gnm1.ann1.EFML97	Arahy.04：126269923-126275534
arahy.Tifrunner.gnm1.ann1.MAM16D	Arahy.14：140744183-140746208	arahy.Tifrunner.gnm1.ann1.09C040	Arahy.04：126308653-126310678
arahy.Tifrunner.gnm1.ann1.M84CU1	Arahy.14：140763554-140765206	arahy.Tifrunner.gnm1.ann1.MMWN9B	Arahy.04：126327151-126329676
arahy.Tifrunner.gnm1.ann1.II1KZ3	Arahy.14：140766822-140769393	arahy.Tifrunner.gnm1.ann1.X0G52T	Arahy.04：126331292-126333863
arahy.Tifrunner.gnm1.ann1.S178WR	Arahy.14：140784254-140786339	arahy.Tifrunner.gnm1.ann1.7LAG9G	Arahy.04：126348724-126350809
arahy.Tifrunner.gnm1.ann1.FL9AGG	Arahy.14：4586495-4589113	arahy.Tifrunner.gnm1.ann1.A26VA3	Arahy.04：3250075-3252744
arahy.Tifrunner.gnm1.ann1.M84CU1	Arahy.14：140763554-140765206	arahy.Tifrunner.gnm1.ann1.A0TG2R	Arahy.04：126168974-126172112
arahy.Tifrunner.gnm1.ann1.68D2LB	Arahy.14：140825770-140828390	arahy.Tifrunner.gnm1.ann1.09C040	Arahy.04：126308653-126310678
arahy.Tifrunner.gnm1.ann1.UIW2EQ	Arahy.15：160180387-160183545	arahy.Tifrunner.gnm1.ann1.DNVT9B	Arahy.05：115120458-115125778
arahy.Tifrunner.gnm1.ann1.RIMI91	Arahy.15：20786250-20788722	arahy.Tifrunner.gnm1.ann1.AXI81X	Arahy.05：36741742-36744166
arahy.Tifrunner.gnm1.ann1.9W7Z3M	Arahy.10：95764052-95768575	arahy.Tifrunner.gnm1.ann1.W8H4W4	Arahy.08：10392801-10397328
arahy.Tifrunner.gnm1.ann1.YYE7NP	Arahy.17：126637986-126642522	arahy.Tifrunner.gnm1.ann1.W8H4W4	Arahy.08：10392801-10397328
arahy.Tifrunner.gnm1.ann1.DJE5AQ	Arahy.17：128811306-128814028	arahy.Tifrunner.gnm1.ann1.IAZ4XM	Arahy.08：12157843-12160584
arahy.Tifrunner.gnm1.ann1.SVZ6B5	Arahy.19：4118148-4120467	arahy.Tifrunner.gnm1.ann1.TWR7CT	Arahy.09：3204984-3207717
arahy.Tifrunner.gnm1.ann1.XH3FAH	Arahy.19：4203330-4204108	arahy.Tifrunner.gnm1.ann1.U952AB	Arahy.09：3256719-3258385
arahy.Tifrunner.gnm1.ann1.PRFE0Z	Arahy.19：4210891-4213636	arahy.Tifrunner.gnm1.ann1.TE0DUK	Arahy.09：3282051-3283572
arahy.Tifrunner.gnm1.ann1.YXHH77	Arahy.19：4288643-4292808	arahy.Tifrunner.gnm1.ann1.9JS9NA	Arahy.09：3366513-3371397
arahy.Tifrunner.gnm1.ann1.KU1CJZ	Arahy.19：5723252-5724989	arahy.Tifrunner.gnm1.ann1.SML81V	Arahy.09：4512244-4513480
arahy.Tifrunner.gnm1.ann1.NJ4UUV	Arahy.19：7951561-7961121	arahy.Tifrunner.gnm1.ann1.WX0X0K	Arahy.09：6575256-6579883
arahy.Tifrunner.gnm1.ann1.RJB6DE	Arahy.19：138997755-139002566	arahy.Tifrunner.gnm1.ann1.ELS2X1	Arahy.09：106599075-106603494
arahy.Tifrunner.gnm1.ann1.CIN5QE	Arahy.19：36668216-36670203	arahy.Tifrunner.gnm1.ann1.693WQ9	Arahy.09：29457582-29459595
arahy.Tifrunner.gnm1.ann1.YYE7NP	Arahy.17：126637986-126642522	arahy.Tifrunner.gnm1.ann1.9W7Z3M	Arahy.10：95764052-95768575
arahy.Tifrunner.gnm1.ann1.W5GG00	Arahy.19：3672829-3677608	arahy.Tifrunner.gnm1.ann1.K2HCDK	Arahy.10：1591895-1593812

## Sheet: S7
Duplicated Gene Pairs	Ka	Ks	Ka/Ks	MYA
AhFBX2/AhFBX53	0.0263	0.0072	0.7318	2.2148
AhFBX6/AhFBX55	0.0066	0.0072	0.1556	2.6269
AhFBX4/AhFBX54	0.0129	0.0131	0.443	1.7937
AhFBX23/AhFBX70	0.0071	0.0257	0.2384	1.8232
AhFBX8/AhFBX57	0.0011	0.0264	0.1548	0.4404
AhFBX17/AhFBX70	0.2109	0.0287	0.9666	13.4342
AhFBX21/AhFBX71	0.0884	0.0291	0.5363	10.1447
AhFBX26/AhFBX75	0.0368	0.0296	0.5974	3.7897
AhFBX25/AhFBX74	0.0247	0.0297	0.83	1.8333
AhFBX31/AhFBX51	0.0014	0.0298	0.0523	1.6242
AhFBX31/AhFBX77	0.0013	0.0312	0.0451	1.8312
AhFBX32/AhFBX78	0.0055	0.036	0.177	1.9195
AhFBX36/AhFBX83	0.0278	0.0427	3.8572	0.443
AhFBX42/AhFBX87	0.0188	0.0552	0.7291	1.5841
AhFBX44/AhFBX89	0.0557	0.0615	0.7181	4.7766
AhFBX47/AhFBX92	0.0389	0.0776	0.361	6.6356
AhFBX46/AhFBX91	0.0061	0.1078	0.2124	1.768
AhFBX51/AhFBX77	0.0014	0.1647	0.1055	0.8049
AhFBX50/AhFBX94	0.0269	0.2182	0.4869	3.3983

## Sheet: S8
Gene ID	leaf1	leaf2	leaf3	veg shoot	repr shoot	root	nodule	perianth	stamen	pistil	peg tip 1	peg tip 2	Pattee 1 pod	fruit Pat.	Pattee 3 pod	pericarp Pat. 5	pericarp Pat. 6	seed Pat. 5	seed Pat. 6	seed Pat. 7	seed Pat. 8	seed Pat. 10
AhFBX1	80.3333	95.3333	16.6667	27	54	92.3333	452.333	21.6667	51	251	279.333	93.3333	541	279.333	338	237.333	128.333	90	216.5	99.5	72	82
AhFBX2	10	16.6667	10.6667	13.6667	19.6667	33.6667	7.66667	1	16	15.3333	41	9.66667	25	36.6667	36.5	27.6667	7	64.5	101	70	11	4
AhFBX3	0	1	0.333333	1.66667	5.33333	3	0	0	5.5	0	0.666667	3.33333	0	2.66667	0	2.66667	0	15	8.5	4.5	2	0
AhFBX4	0	0	0	0	0	0	0	0	0	0	0	0	0	0	0	0	0	0	0	0	0	0
AhFBX5	0	0	0	0	0.333333	0	0	0	0	0	0	0	0	0	0	0	0	0	0	0	0	0
AhFBX6	1072.67	529	343.667	3	18	20.3333	567.667	120.667	1	844.333	397.667	3.33333	80	4	3	12.6667	12	10.5	20	24	4	0
AhFBX7	0	0	0	0	0	0	0	0	0	0.666667	0	0	0	7	10.5	4	0	69	89	41.5	9	4.5
AhFBX8	205.667	151	43.6667	47.3333	116.333	148.333	558.667	102.333	30.5	142.333	270	34.3333	152	128.333	130.5	154.667	93.6667	142	270	179	145	73
AhFBX9	1	0	0.666667	0	4.33333	0	0	0	1	0	0	1.33333	0	1.66667	0.5	2.66667	0	1.5	0	0	0	0
AhFBX10	13.6667	11.6667	8	2	2.33333	2	1	3.33333	4	50.6667	5.33333	4.66667	2	2	3	2	1.33333	17.5	23.5	2.5	1	0
AhFBX11	14.3333	25.6667	7	26.3333	42	42.6667	16.3333	1.33333	23	10.3333	31	12.3333	22	35.3333	34.5	23.6667	9.33333	60	70.5	35	14	9.5
AhFBX12	1.33333	2	0	1	2.66667	1	1.66667	0	0	2	0	1.33333	2	2	2	1.66667	0	2	4.5	5	1	0
AhFBX13	0	0.333333	0	0	0	0	0	0	0	0	0	0	0	0	0	0	0	0	0	0	0	0
AhFBX14	0	0	0	0	0	0	0	0	0	0	0	0	0	0	0	0	0	0	0	0	0	0
AhFBX15	0	0	0	0	0	0	0	0	0	0	0	0	0	0	0	0	0	0	0	0	0	0
AhFBX16	0	0	0	0	0	0	0	0	0	0	0	0	0	0	0	0	0	0	0	0	0	0
AhFBX17	0	0	0	0	0	0	0	0	0	0	0	0	2	0	0	0	0	0	0	0	0	0
AhFBX18	0	0	0	0	0	0	0	0	0	0	0	0.666667	0	0	0	0	0	0	0	0	0	0
AhFBX19	0	0	0	0	0	0	0.333333	0	0	0	0	0	0	0	0	0	0	0	0	0	0	0
AhFBX20	0	0	0	0	0	0	0	0	0	0	1.33333	0	2	0.666667	1	0	0	0	0	6	0	0
AhFBX21	0	0	0	0	0	0	0	0	0	0	0	0	0	0	0	0	0	0	0	0	0	0
AhFBX22	0	0	0	0	0	0	0	0	0	0	0	0	0	0	0	0	0	0	0	0	0	0
AhFBX23	0	0	0	0	0	0	0	0	0	0	0	0	0	0	0	0	0	0	0	0	0	0
AhFBX24	0	0	0	0	0	0	0	0	0	0	0	0	0	0	0	0	0	0	0	0	0	0
AhFBX25	0	0	0	0	0.333333	0	0.333333	0	0	0	0	0	0	13.3333	18	10.6667	2.66667	56	1.5	0	0	0
AhFBX26	85	129	25.3333	78	128.667	238.667	237.333	24.3333	40	95.3333	100	39.6667	298	159.333	184.5	233	199.333	159	353.5	292.5	181	196
AhFBX27	16.6667	16	5.33333	11.3333	23.6667	44	26.6667	10.6667	91	60	82	79.3333	187	250.667	285.5	208.333	289.667	57.5	88.5	88.5	24	8
AhFBX28	13.3333	4.33333	1.66667	3	2.66667	381	945.333	1.66667	3	6.33333	24.6667	19.6667	670	327.667	419.5	862.333	612	250	288	314	110	8
AhFBX29	33.3333	41.3333	11	7.66667	17	37	44.3333	7.33333	5	50	15.3333	4.66667	18	18	17	22	7.33333	7.5	19	11.5	7	14.5
AhFBX30	6.33333	12	2.66667	1	7.66667	37.6667	7.66667	0	7	8.66667	10.3333	6	22	13.3333	9	5.66667	3.33333	13	21	11.5	2	1
AhFBX31	686.667	613.667	194.333	136.667	225.667	675	702.667	511	218.5	1007	695	252.333	1526	585.333	734	1210.33	678.333	612	815	617.5	238	382.5
AhFBX32	180.667	201.333	71.3333	47	92.6667	554.333	728.667	101.333	47	256.667	478.333	107.667	1539	1114.67	1386	1878.33	1468.67	274	712.5	698.5	251	168.5
AhFBX33	47.3333	72.6667	18	27	41.6667	93.3333	45.3333	16.3333	25	55.3333	78	26.6667	86	50.3333	51.5	80.6667	44	52	63.5	54.5	10	20.5
AhFBX34	0	0	0	0	0	0	0	0	0	0	1	0	2	2	3	1.33333	1.33333	0.5	3	1	0	0
AhFBX35	5.33333	7.33333	2.66667	5	9	70	135.667	1.66667	6.5	9.66667	6.33333	6	12	22.6667	30	26.3333	12.6667	39	40.5	12	5	3.5
AhFBX36	10.3333	13.6667	3.33333	14.6667	42.6667	53.3333	40.6667	6	28.5	15	24.6667	14.3333	36	45.6667	52	37.3333	25.3333	46.5	62	29	6	7.5
AhFBX37	29	41.6667	11.3333	38	65	118.333	129	2.66667	34.5	31	57.3333	22	42	87.6667	82.5	67	48	60	79	36.5	16	5.5
AhFBX38	27	53.3333	15.6667	43	79.3333	86	104	10.3333	56.5	35.3333	129.667	67	109	135.667	140	127	88.6667	122.5	177	119	87	84.5
AhFBX39	19.6667	24	7.66667	6	16	26.3333	61.3333	2.66667	7	18.3333	21	10.6667	26	20.6667	23.5	19.3333	11.3333	33.5	41	30.5	6	8.5
AhFBX40	148.333	282.333	61.6667	117	200.667	208	175.333	11.6667	115.5	121	336	135.333	165	237	236.5	239	148.667	262.5	383	256.5	96	138
AhFBX41	14.3333	13.6667	1.33333	15	27.6667	23	16	2.66667	10	11.6667	25.3333	5	17	15.3333	17.5	12.6667	25.6667	30	72.5	122.5	61	22.5
AhFBX42	7	12.3333	2	6	12.3333	4.33333	1.66667	0	2	8	5	1.33333	13	12.6667	15	12	8.66667	10.5	12.5	6	2	2
AhFBX43	0	0	0	0	0	0	0	0	0	0	0	0	0	0	0	0	0	0	0	0	0	0
AhFBX44	0	0	0	0	0.333333	0	0	0	0	0	0	0	0	0	0	0	0.666667	0	0.5	0	0	0
AhFBX45	142.333	167.333	52	84.3333	158.667	300.667	386.667	140.667	80.5	222	317.333	71.3333	246	270	318	404.667	261	223.5	341.5	238	92	113
AhFBX46	5	4	0.666667	15	10.3333	318.667	2576.67	92	7.5	12	37.6667	16	1356	135.667	183	396.667	596.667	34.5	131	143.5	89	52.5
AhFBX47	62.3333	72	13.6667	18	28.3333	59.3333	67	17.3333	12	77	55.6667	14.6667	84	47.3333	61	89.3333	62.3333	104	128.5	85.5	61	87
AhFBX48	42.3333	67.6667	13.3333	43.6667	70	92.3333	67.3333	2.66667	25	23.6667	51.3333	33	30	83	90	84.3333	34.3333	128.5	182	106	63	48.5
AhFBX49	3.66667	7.33333	2	11.6667	14.6667	8	3	1.33333	10	8.66667	10.3333	8.66667	2	9.33333	5	4.66667	1.33333	25.5	28	23	6	10
AhFBX50	0	0	0	0	4	22	9.66667	0.666667	0	3.33333	0	1.33333	0	1.33333	2	0	0	9.5	16.5	17	2	4.5
AhFBX51	87.3333	97	26	26	39.3333	107	89.3333	63.6667	109.5	483.333	353.333	221	850	385.667	486.5	376	425	86	95.5	71.5	36	80.5
AhFBX52	32.6667	49.3333	12	15.6667	21	20	2.66667	0	12	25.3333	11.3333	7.33333	0	13.3333	15.5	11.3333	4	35.5	48.5	25	14	9
AhFBX53	64.3333	79	28	46.6667	81	79.3333	33.6667	6.33333	22	54	53	27.6667	60	61.3333	62	42.6667	22	81.5	96	61.5	19	26
AhFBX54	0	0	0	0	0	0	0	0	0	0	0	0	0	0	0	0	0	0	0	0	0	0
AhFBX55	6169	2472.67	1374.33	54.6667	212.667	176	1380.33	120.667	19	3473.33	2755	35.3333	639	91.3333	107	231.333	144	99	282.5	183.5	58	72
AhFBX56	230.667	284.667	78.6667	52.6667	117.333	420.333	277.333	108.667	52	306	384.667	114	436	333	389	449	370.667	168	318	304.5	101	119.5
AhFBX57	181	159	37	40.6667	117.667	112	666.667	124.667	34	174.333	145	28.6667	97	151.333	179.5	125.333	98	140	245.5	162.5	114	52.5
AhFBX58	0	0	0	0	6	0	0	0	1	0.333333	0.333333	0.666667	2	0	0	0	0	14.5	12	1	0	0
AhFBX59	10.3333	11.3333	6.66667	16.3333	28	35.3333	12.3333	1.33333	7.5	5	17	15.6667	14	25.6667	24.5	22	10	26	35.5	22	2	3.5
AhFBX60	0.333333	0.333333	0	0.333333	1	0	1	0	0	2	1.33333	1.33333	2	2	1	4	0	1.5	1	0	0	0
AhFBX61	0.333333	0	0	0	0.333333	0.333333	0	0	0.5	0	2	1.33333	0	4.66667	5	0.666667	0.666667	0	0.5	1	0	0
AhFBX62	0	0	0	0	0	0	0	0	0	0	0	0	0	0	0	0	0.666667	0	0	0	0	0
AhFBX63	0.666667	2	0.333333	0	0	0	0	0	0	1	0.666667	0.666667	0	0	0	1	0	1	1.5	6.5	0	0.5
AhFBX64	0	0.666667	0	0	0.666667	0.333333	0	0.333333	0	0.333333	1.33333	0.333333	0	0	0	0.333333	0	0	0	0	0	0
AhFBX65	0	0	0	0	0	0	0.333333	0	0	0	0.333333	0	0	0	0	0	0	0.5	0	0	0	0
AhFBX66	0	1	0	0.666667	0	0.333333	1	0.333333	1	0.666667	1	1	1	0.666667	0	2	1.33333	1.5	1	0	2	0
AhFBX67	0	1	0	0	0.333333	1.66667	0.666667	0	0	1.33333	1.66667	0.666667	0	0	0	0.333333	1.33333	2.5	0.5	1.5	1	0
AhFBX68	0	0	0	0	0.333333	0	0	0	0	0	0	0.666667	0	1.33333	2	0.666667	0.666667	0	0.5	0	0	0
AhFBX69	0	0.666667	0	1	2	3.33333	1	0.333333	0	0.666667	3	1.33333	4	0	0	0.666667	0	2	3.5	2	0	0
AhFBX70	0	1	0	0	0	0.333333	0	0	0	1.33333	3.33333	0.666667	0	1.33333	1	0.666667	0	1.5	1	0	0	0
AhFBX71	0	0	0	0	0	0	0	0	0	0	0	0	0	0	0	0	0	0	0	0	0	0
AhFBX72	0	0	0	0	0.333333	2.33333	0.333333	0	0	0	0	0	0	0	0	0	0	1	0.5	0.5	0	0.5
AhFBX73	0	0	0	0	0	0	0	0	0	0	0	0	0	0	0	0	0	0	0	0	0	0
AhFBX74	0	0.333333	0	1	1.33333	1.33333	2.33333	0	0	0.666667	0	0	0	19.3333	28	8.66667	1.33333	108.5	20.5	10.5	9	3
AhFBX75	180.333	252.333	48.6667	86	152	321	351.333	81	131	232.667	349.333	159	459	258.333	303.5	412.333	270.333	314.5	420	326	175	149
AhFBX76	0	0	0	0	0	6.66667	0	1	0	3.33333	1.33333	0	0	0.666667	1	0	0	0.5	0.5	1.5	0	2
AhFBX77	181	184.333	50.6667	55	76	159.667	189.333	113	65	345.667	206.667	135	500	248.333	295.5	262.333	229	192.5	241.5	149	45	139
AhFBX78	188.667	192.667	65	28.3333	60	203.333	219.333	64.3333	43.5	199	278.333	64	570	400.333	486	656.333	447.667	127.5	322.5	295.5	135	80
AhFBX79	0.666667	1.33333	0	0	1	0	0	0	0	6.66667	0	0	0	0	0	0	1.33333	4.5	5	23.5	4	1.5
AhFBX80	0	0	0	0	0	0	0.333333	0	0	0	0	0	0	0	0	0	0	0	0	0	0	0
AhFBX81	0.333333	1.33333	0.333333	0.333333	6	1.66667	0.666667	0	4	0	3.33333	1.33333	2	0	0	0.666667	0	2	5	6.5	1	0
AhFBX82	76.6667	126.667	27.6667	72.3333	138.333	143	146.333	17.6667	78	78.6667	201.667	96.6667	173	195.333	221.5	197.333	119.333	181	278	178.5	76	89
AhFBX83	7.33333	19.3333	3	14.3333	36	24.3333	21.3333	3.66667	8.5	21.3333	24.3333	10.6667	29	28	32	30	22.6667	31	33	32.5	13	25
AhFBX84	45.6667	92.3333	20	31.6667	53.6667	67	21.6667	22.3333	53.5	79.3333	93.6667	46.6667	84	64	57.5	35.3333	25.6667	106.5	98.5	55	21	21
AhFBX85	47	68.3333	16.6667	44	77.3333	123.333	202.667	4	30.5	29.3333	49	18.6667	31	86	84.5	70.3333	34.6667	70	108.5	57.5	28	14
AhFBX86	44.3333	67.6667	19	39.3333	64.3333	62.6667	33	11	25.5	50.3333	63.3333	17.3333	50	64.6667	69	79.3333	43.3333	68	111	89	54	24.5
AhFBX87	5.66667	14	5.33333	9	17.6667	27.6667	11	5	7	8	14	15.3333	16	16.3333	17.5	14.3333	11.6667	18	27.5	20.5	22	13
AhFBX88	1.66667	3.33333	0.666667	2.33333	2	1.33333	0.333333	1	0	4	5	0.333333	4	2.33333	3	1.66667	3.33333	9.5	19	26.5	4	12.5
AhFBX89	0	0	0	1.66667	2.66667	35.6667	7.33333	0.333333	3	0.666667	3.33333	4.66667	4	14	16	15	10	4	8	25	11	5
AhFBX90	150.667	193	57	85.3333	174	332.667	416.667	134	97	255.667	321	88.6667	242	290.333	354.5	436	274.667	328.5	459	259.5	105	108.5
AhFBX91	5	3.66667	0.333333	19.3333	22.3333	161.667	1078.67	72.3333	1	9.66667	46.6667	34.6667	700	97	132	227.333	356.333	81	207.5	151.5	55	44.5
AhFBX92	73	88.3333	25	20	16	119.333	79	12.3333	5	76	66.3333	19.6667	52	35.6667	47.5	56.3333	34.6667	70	76	94.5	39	88.5
AhFBX93	43.6667	64.6667	19	63.3333	98.6667	167.333	168.333	4.33333	48	37.6667	96.6667	40.3333	78	130	142	129.333	68	106	153.5	81.5	28	52
AhFBX94	3.66667	1.66667	1.33333	1.66667	3.66667	227.333	286.667	11.3333	9	5.33333	18	26	114	170	190.5	165.333	198	148	426.5	593	263	64
AhFBX95	1	0	0.666667	0	4.33333	0	0	0	1	0	0	1.33333	0	1.66667	0	2.66667	0	1.5	0	0	0	0

## Sheet: S9
# Gene ID	Gene Name	J05-1_FPKM	J05-2_FPKM	J05-3_FPKM	J10-1_FPKM	J10-2_FPKM	J10-3_FPKM	J15-1_FPKM	J15-2_FPKM	J15-3_FPKM	J20-1_FPKM	J20-2_FPKM	J20-3_FPKM	J25-1_FPKM	J25-2_FPKM	J25-3_FPKM	J30-1_FPKM	J30-2_FPKM	J30-3_FPKM	M05-1_FPKM	M05-2_FPKM	M05-3_FPKM	M10-1_FPKM	M10-2_FPKM	M10-3_FPKM	M15-1_FPKM	M15-2_FPKM	M15-3_FPKM	M20-1_FPKM	M20-2_FPKM	M20-3_FPKM	M25-1_FPKM	M25-2_FPKM	M25-3_FPKM	M30-1_FPKM	M30-2_FPKM	M30-3_FPKM
arahy.Tifrunner.gnm1.ann1.S8ICGN	AhFBX1	4.00632	0.20523	3.91105	2.37994	2.70413	2.42251	0.234456	1.17815	1.44567	0.194809	5.31108	4.26663	3.97599	4.27764	0.151626	2.85938	1.85228	1.81876	0.231254	1.69313	0.271478	2.88496	3.31972	2.12866	3.96087	2.49098	3.48154	1.72599	0.333763	0.189214	6.80148	6.81115	6.50342	0.179516	4.01415	2.14491
arahy.Tifrunner.gnm1.ann1.6LM7DE	AhFBX2	0.435668	1.35935	1.08549	0.584799	1.10852	0.882898	0.744032	0.703004	1.15867	0.204712	0.463849	0.251585	0.202832	0.238905	0.300766	0.80776	1.0855	0.359512	1.30573	0.792882	0.748036	0.935622	0.704338	0.398078	0.133502	0.956032	0.123532	1.22756	0.378637	0.61231	0.309506	0.416899	0.263244	0.367989	0.288679	0.320471
arahy.Tifrunner.gnm1.ann1.I0AFD1	AhFBX3	0.135495	0.088019	0.146777	0.181398	0.167851	0.167567	0	0	0	0	0.021208	0.114993	0	0.107817	0.057687	0.120452	0.086047	0	0.059952	0.241292	0.10598	0.518166	0.454937	0.178164	0.110605	0.168451	0.244692	0.208006	0.042512	0.087789	0.118976	0.161025	0.067417	0.033433	0.133118	0.043433
arahy.Tifrunner.gnm1.ann1.FB190S	AhFBX4	4.84805	3.47854	3.91555	3.34675	2.91903	3.46576	4.05445	3.17142	3.56992	4.10218	4.18554	2.40602	2.74581	1.48001	1.55607	3.39577	3.49262	2.49497	4.40996	2.01462	5.49225	2.17089	2.615	1.50171	3.942	3.34698	3.30125	3.15236	3.07087	4.98273	3.40631	3.35317	3.35693	3.71583	2.84125	2.45797
arahy.Tifrunner.gnm1.ann1.U37KZ8	AhFBX5	0	0	0	0	0	0	0	0	0	0	0.021208	0.114993	0	0.107817	0.057687	0.120452	0.086047	0	0.059952	0.241292	0.10598	0.518166	0.454937	0.178164	0.110605	0.168451	0.244692	0.208006	0.042512	0.087789	0.118976	0.161025	0.067417	0.033433	0.133118	0.043433
arahy.Tifrunner.gnm1.ann1.2I2XLP	AhFBX6	0.248521	0.234885	0.399671	0.471664	0.441502	0.308702	0.574652	0.608343	0.430815	0.067049	0.278866	0.377202	0.566773	0.234632	0.155566	0.101541	0.227666	0.578022	0.138208	0.728286	0.112084	0.898104	0.547999	1.21887	0.998448	0.800792	0.74027	0.271432	0.249164	0.272265	0.42109	0.096941	0.680919	0.364504	0.264188	0.548517
arahy.Tifrunner.gnm1.ann1.AC2G74	AhFBX7	0	0	0	0	0	0	0	0	0	0	0.021208	0.114993	0	0.107817	0.057687	0.120452	0.086047	0	0.059952	0.241292	0.10598	0.518166	0.454937	0.178164	0.110605	0.168451	0.244692	0.208006	0.042512	0.087789	0.118976	0.161025	0.067417	0.033433	0.133118	0.043433
arahy.Tifrunner.gnm1.ann1.A26VA3	AhFBX8	13.7533	15.2222	14.443	15.7092	16.0721	14.4575	18.8694	14.1104	18.8933	22.233	18.1578	13.6909	13.7549	14.2697	11.9269	15.7817	15.0269	15.0212	13.9316	9.54251	12.1712	14.5551	11.5643	8.90827	16.5745	14.8789	13.4886	12.9803	13.6946	15.8711	16.3927	19.4235	14.4065	16.6459	10.0806	10.4978
arahy.Tifrunner.gnm1.ann1.8IRE12	AhFBX9	0.137209	0.035155	0.192443	0.207523	0.069694	0.060205	0.141639	0.117	0.210833	1.11926	0.891607	1.8036	0.469959	1.90573	1.33499	0.10568	0	0	0.059952	0.241292	0.10598	0.518166	0.454937	0.178164	0.110605	0.168451	0.244692	0.208006	0.042512	0.087789	0.118976	0.161025	0.067417	0.033433	0.133118	0.043433
arahy.Tifrunner.gnm1.ann1.I5L8FP	AhFBX10	0.230158	0.103714	0.099309	0.090914	0.179988	0.128561	0.0403	0.106002	0.053128	0	0.021208	0.114993	0	0.107817	0.057687	0.120452	0.086047	0	0.059952	0.241292	0.10598	0.518166	0.454937	0.178164	0.110605	0.168451	0.244692	0.208006	0.042512	0.087789	0.118976	0.161025	0.067417	0.033433	0.133118	0.043433
arahy.Tifrunner.gnm1.ann1.KD9PJ3	AhFBX11	1.01569	0.861972	0.577022	0.552393	0	0	0	0	0	0	0.021208	0.114993	0	0.107817	0.057687	0.120452	0.086047	0	0.059952	0.241292	0.10598	0.518166	0.454937	0.178164	0.110605	0.168451	0.244692	0.208006	0.042512	0.087789	0.118976	0.161025	0.067417	0.033433	0.133118	0.043433
arahy.Tifrunner.gnm1.ann1.3QCW2V	AhFBX12	0.074273	0.138892	0.091821	0.058641	0.127498	0.046485	0.090968	0.085861	0.037718	0.055396	0.042919	0.123065	0	0.107817	0.057687	0.120452	0.086047	0	0.059952	0.241292	0.10598	0.518166	0.454937	0.178164	0.110605	0.168451	0.244692	0.208006	0.042512	0.087789	0.118976	0.161025	0.067417	0.033433	0.133118	0.043433
arahy.Tifrunner.gnm1.ann1.LFQ4L6	AhFBX13	0.33552	0.124769	0.05386	0	0	0	0	0	0	0	0.021208	0.114993	0	0.107817	0.057687	0.120452	0.086047	0	0.059952	0.241292	0.10598	0.518166	0.454937	0.178164	0.110605	0.168451	0.244692	0.208006	0.042512	0.087789	0.118976	0.161025	0.067417	0.033433	0.133118	0.043433
arahy.Tifrunner.gnm1.ann1.X0G52T	AhFBX14	0.236587	0.239567	0	0	0	0	0	0	0	0	0.021208	0.114993	0	0.107817	0.057687	0.120452	0.086047	0	0.059952	0.241292	0.10598	0.518166	0.454937	0.178164	0.110605	0.168451	0.244692	0.208006	0.042512	0.087789	0.118976	0.161025	0.067417	0.033433	0.133118	0.043433
arahy.Tifrunner.gnm1.ann1.8CD6MN	AhFBX15	0.011986	0.019574	0.050764	0.028797	0.027883	0.045712	0.003098	0	0	0	0.021208	0.114993	0	0.107817	0.057687	0.120452	0.086047	0	0.059952	0.241292	0.10598	0.518166	0.454937	0.178164	0.110605	0.168451	0.244692	0.208006	0.042512	0.087789	0.118976	0.161025	0.067417	0.033433	0.133118	0.043433
arahy.Tifrunner.gnm1.ann1.7LAG9G	AhFBX16	0.266681	0.004369	0.291182	0.052449	0.169763	0.283632	0.300414	0.205958	0.277268	0.177462	0.017034	0.117584	0.06878	0.109241	0.133265	0.15527	0.204443	0.060653	0.015302	0.074513	0.042864	0.034054	0.120156	0.082333	0.078045	0.041205	0.033562	0.015056	0.042087	0.015075	0	0	0	0	0	0
arahy.Tifrunner.gnm1.ann1.A0TG2R	AhFBX17	1.0096	1.06229	1.41623	0.101767	1.12323	1.3606	1.34205	1.40531	1.67626	1.16235	0.857726	0.883071	2.19371	1.41106	0.028639	1.35726	0.026244	0	0.059952	0.241292	0.10598	0.518166	0.454937	0.178164	0.110605	0.168451	0.244692	0.208006	0.042512	0.087789	0.118976	0.161025	0.067417	0.033433	0.133118	0.043433
arahy.Tifrunner.gnm1.ann1.SLE2S5	AhFBX18	0	0	0	0	0	0	0	0	0	0	0.021208	0.114993	0	0.107817	0.057687	0.120452	0.086047	0	0.059952	0.241292	0.10598	0.518166	0.454937	0.178164	0.110605	0.168451	0.244692	0.208006	0.042512	0.087789	0.118976	0.161025	0.067417	0.033433	0.133118	0.043433
arahy.Tifrunner.gnm1.ann1.AE1TV9	AhFBX19	0.441283	0.54271	0.452786	0.995253	1.02862	0.554113	0.150972	0.110197	0.150364	0.142001	0.206031	0.226544	0.234364	0.083564	0.248483	1.48991	1.44328	2.87475	0.219582	0.291044	0.413029	1.22161	1.37914	1.04898	1.0269	0.823953	1.43751	0.222945	0.188322	0.247841	0.175031	0.332289	0.903912	1.91072	1.47663	3.24647
arahy.Tifrunner.gnm1.ann1.1H6I1Z	AhFBX20	0	0	0	0	0	0	0	0	0	0	0.021208	0.114993	0	0.107817	0.057687	0.120452	0.086047	0	0.059952	0.241292	0.10598	0.518166	0.454937	0.178164	0.110605	0.168451	0.244692	0.208006	0.042512	0.087789	0.118976	0.161025	0.067417	0.033433	0.133118	0.043433
arahy.Tifrunner.gnm1.ann1.09C040	AhFBX21	0.137873	0.112559	0.206376	0.011351	0.097184	0.069253	0.028406	0.083733	0.106061	0.084417	0.109347	0.067863	0.090877	0.20556	0.08995	0.147398	0.062975	0.083203	0	0	0	0	0	0	0	0	0	0	0	0	0	0	0	0	0	0
arahy.Tifrunner.gnm1.ann1.R40TSQ	AhFBX22	0.019837	0	0	0	0	0	0	0	0	0	0.021208	0.114993	0	0.107817	0.057687	0.120452	0.086047	0	0.059952	0.241292	0.10598	0.518166	0.454937	0.178164	0.110605	0.168451	0.244692	0.208006	0.042512	0.087789	0.118976	0.161025	0.067417	0.033433	0.133118	0.043433
arahy.Tifrunner.gnm1.ann1.MMWN9B	AhFBX23	0.8366	1.26537	0.069362	0.446235	0.870043	0.603505	0.202148	0.602306	1.01642	0.85745	0.631191	0.938989	0.650653	0.872803	0.376013	0.875491	0.438837	0.524678	1.12922	0.61627	0.077354	0.466411	0.661352	0.002521	0.908249	0.836186	0.439426	0.556864	0.368851	0.698485	0.053353	0.809742	0.056537	0.032135	0.060269	0
arahy.Tifrunner.gnm1.ann1.EFML97	AhFBX24	0	0	0	0	0	0	0	0	0	0	0.021208	0.114993	0	0.107817	0.057687	0.120452	0.086047	0	0.059952	0.241292	0.10598	0.518166	0.454937	0.178164	0.110605	0.168451	0.244692	0.208006	0.042512	0.087789	0.118976	0.161025	0.067417	0.033433	0.133118	0.043433
arahy.Tifrunner.gnm1.ann1.AXI81X	AhFBX25	0	0	0	0	0	0	0	0	0	0	0.021208	0.114993	0	0.107817	0.057687	0.120452	0.086047	0	0.059952	0.241292	0.10598	0.518166	0.454937	0.178164	0.110605	0.168451	0.244692	0.208006	0.042512	0.087789	0.118976	0.161025	0.067417	0.033433	0.133118	0.043433
arahy.Tifrunner.gnm1.ann1.DNVT9B	AhFBX26	1.9201	2.28331	1.88644	1.59636	2.00028	1.83904	1.65195	1.4531	1.2868	1.87349	1.72541	2.16324	2.30544	2.11114	2.33381	1.93849	2.06939	1.86972	1.99196	2.02925	1.79129	2.61353	2.77416	3.00019	1.77395	1.87788	2.41044	1.80952	1.71915	1.72205	2.62963	1.77569	2.56589	2.40044	2.6435	3.1891
arahy.Tifrunner.gnm1.ann1.49J1TU	AhFBX27	4.97969	6.06021	5.24449	5.39102	6.71088	1.57793	7.46608	7.47326	1.13202	8.04006	2.45774	8.14162	7.92202	6.38324	7.40855	5.53349	1.17216	11.6742	1.71109	5.14875	2.58266	6.02729	5.0481	5.92267	1.12857	5.81782	6.5478	1.58339	2.51288	7.47654	5.73839	5.41111	7.65281	0.927512	1.08011	1.88794
arahy.Tifrunner.gnm1.ann1.XNP3RF	AhFBX28	0.027496	0.094372	0.105035	0.286089	0.476461	0.569239	1.31958	1.9166	3.17521	0.65184	0.776606	12.0082	5.72927	21.5203	4.52091	0.462234	0.988878	5.4195	0.031826	1.56768	0	0	0	0	0	0	0	0	0	0	0	0	0	0	0	0
arahy.Tifrunner.gnm1.ann1.U0A6F2	AhFBX29	1.34148	1.4825	1.41177	0.945917	2.13161	0.907552	0.97616	1.1033	0.957003	0.871994	1.12107	0.97287	0.751064	0.750794	1.02156	1.24313	0.666304	1.27002	0.961148	1.13984	2.52071	1.72587	0.665544	0.841146	0.961743	1.15486	1.15617	1.48441	1.21895	1.02142	1.05893	1.19508	1.03308	1.01711	1.27367	1.14822
arahy.Tifrunner.gnm1.ann1.4JU4D9	AhFBX30	0.323471	0.273264	0.297754	0.374851	0.379021	0.514033	0.363243	0.275099	0.549789	0.566409	0.462651	0.234531	0.183311	0.127352	0.178727	0.632354	0.440049	0.35558	0.357282	0.549656	0.226001	0.287635	0.346497	0.339108	0.618509	0.373024	0.469712	0.701887	0.324336	0.452244	0.179801	0.737768	0.572634	0.114073	0.303577	0.299345
arahy.Tifrunner.gnm1.ann1.W8H4W4	AhFBX31	11.7083	14.9567	16.8841	8.21237	11.0051	10.2494	13.8306	14.5051	16.9525	15.7224	17.4664	18.0807	14.4355	15.1527	13.6675	10.9123	9.20755	10.2075	12.34	9.30485	13.9632	11.8638	8.27754	9.57747	15.3692	15.47	18.7836	10.389	14.4576	14.9622	15.6419	14.9775	15.3615	10.7379	9.07334	8.73061
arahy.Tifrunner.gnm1.ann1.IAZ4XM	AhFBX32	1.84736	2.17651	1.229	0.535535	1.72378	1.42274	2.91219	4.1511	5.26643	5.37308	6.0928	7.12013	2.74611	5.53005	2.99936	1.54413	1.38911	1.67221	0.858279	1.23996	1.29324	0.628638	1.36087	2.287	3.58968	3.33701	4.13992	1.5024	5.47063	5.22905	6.2164	6.58852	6.07324	1.8226	1.43594	3.27212
arahy.Tifrunner.gnm1.ann1.26WN5G	AhFBX33	2.99428	1.91331	1.11631	0.906093	1.74865	2.63563	1.95261	2.19925	1.62116	2.19636	2.08806	1.36851	2.3446	1.59695	1.78537	1.50954	1.68108	1.62357	2.44385	2.1352	1.50444	1.85983	1.84234	1.95966	2.18786	1.91776	1.46574	1.56313	1.39998	2.35895	1.25921	1.75808	2.64868	2.53698	2.1932	1.82017
arahy.Tifrunner.gnm1.ann1.58PES0	AhFBX34	0.062151	0	0	0	0	0	0	0	0	0	0.021208	0.114993	0	0.107817	0.057687	0.120452	0.086047	0	0.059952	0.241292	0.10598	0.518166	0.454937	0.178164	0.110605	0.168451	0.244692	0.208006	0.042512	0.087789	0.118976	0.161025	0.067417	0.033433	0.133118	0.043433
arahy.Tifrunner.gnm1.ann1.GL93TL	AhFBX35	0.531283	1.29555	0.670375	2.001	1.91128	1.17387	1.04317	0.780127	1.48679	1.81831	1.99098	1.02134	0.949331	0.825658	0.62159	1.0259	1.54694	2.10568	0.73978	0.21272	0.82511	1.29984	0.268125	0.728764	0.49211	1.22257	1.47296	0.620956	1.4744	2.64347	1.47013	1.91575	1.49134	0.881585	1.69252	1.43058
arahy.Tifrunner.gnm1.ann1.TWR7CT	AhFBX36	1.14735	1.28302	0.695249	0.797612	1.26033	0.631339	0.569679	0.460177	0.572647	0.512933	0.40951	0.586007	0.588678	0.441434	0.816013	0.332969	0.630693	0.483003	0.687732	1.04418	1.32268	1.1401	0.723441	0.905055	1.08031	0.55847	0.596799	0.961116	0.598709	0.547605	0.932482	1.0499	0.70293	0.435369	0.366478	0.411183
arahy.Tifrunner.gnm1.ann1.F751SF	AhFBX37	3.88981	3.6251	4.1291	1.42428	2.40196	2.39984	1.27224	1.01702	2.01797	0.764424	0.85299	1.26126	0.590479	1.11346	0.839816	1.94919	1.70412	1.05728	2.22576	1.96636	2.06331	4.16899	1.39306	1.28269	2.72441	1.7337	0.987568	2.00239	0.837488	1.93112	1.13872	1.67032	1.20409	1.1142	0.938379	1.01291
arahy.Tifrunner.gnm1.ann1.9JS9NA	AhFBX38	1.9778	1.61752	1.5327	1.99182	1.65536	1.85458	1.11572	1.17617	1.29009	1.10135	0.985148	0.882488	0.871151	1.36482	1.15362	1.16123	0.863696	1.70904	1.88481	1.82332	2.3004	1.95433	2.07034	1.17013	2.00503	2.22955	0.800792	1.23929	1.15831	1.81051	1.35267	1.32082	1.52335	1.57363	1.23974	1.15399
arahy.Tifrunner.gnm1.ann1.6V8N23	AhFBX39	0.459711	0.485788	0.221705	0.397173	0.255748	0.208276	0.452805	0.185606	0.162639	0.31112	0.633379	0.143904	0.217327	0.293481	0.203634	0.368563	0.391423	0.287062	0.470875	0.386657	0.659151	0.45053	0.206017	0.813932	0.592265	0.540453	0.301629	0.519342	0.2168	0.297368	0.136845	0.204451	0.321943	0.365873	0.271596	0.432514
arahy.Tifrunner.gnm1.ann1.H861J2	AhFBX40	6.54621	6.86467	6.05226	4.46414	4.5986	5.21832	4.70512	4.74426	4.67225	4.42407	3.90841	4.01512	2.96191	2.82706	3.04521	3.93568	3.97559	3.11175	5.41803	4.54144	6.51454	6.30612	3.23125	2.69493	5.99557	3.82634	2.90822	4.34758	3.84183	3.69616	3.56313	3.82427	3.74523	3.10724	2.41424	2.84179
arahy.Tifrunner.gnm1.ann1.U952AB	AhFBX41	0.293585	0.379791	0.05275	0.288044	0.236255	0.504194	0.501851	0.423053	0.415763	0.482453	0.667218	1.38565	1.08644	0.566602	0.92972	0.197763	0.258651	0.5502	0.273522	0.117995	0.374919	0.467466	0.56259	0.226554	0.357105	0.324931	0.420262	0	0	0	0	0	0	0	0	0
arahy.Tifrunner.gnm1.ann1.TE0DUK	AhFBX42	0.25763	0.200947	0.220772	0.04385	0.044264	0.111025	0.272057	0.020298	0.102501	0.047177	0	0	0	0.107817	0.057687	0.120452	0.086047	0	0.059952	0.241292	0.10598	0.518166	0.454937	0.178164	0.110605	0.168451	0.244692	0.208006	0.042512	0.087789	0.118976	0.161025	0.067417	0.033433	0.133118	0.043433
arahy.Tifrunner.gnm1.ann1.KT489S	AhFBX43	0	0	0	0	0	0	0	0	0	0	0.021208	0.114993	0	0.107817	0.057687	0.120452	0.086047	0	0.059952	0.241292	0.10598	0.518166	0.454937	0.178164	0.110605	0.168451	0.244692	0.208006	0.042512	0.087789	0.118976	0.161025	0.067417	0.033433	0.133118	0.043433
arahy.Tifrunner.gnm1.ann1.SML81V	AhFBX44	0	0	0	0	0	0	0	0	0	0	0.021208	0.114993	0	0.107817	0.057687	0.120452	0.086047	0	0.059952	0.241292	0.10598	0.518166	0.454937	0.178164	0.110605	0.168451	0.244692	0.208006	0.042512	0.087789	0.118976	0.161025	0.067417	0.033433	0.133118	0.043433
arahy.Tifrunner.gnm1.ann1.WX0X0K	AhFBX45	16.0501	10.8438	16.4088	2.87761	8.09267	9.99403	10.7904	10.6205	10.0809	12.5053	9.63763	12.3701	11.9117	11.3383	10.6984	8.74668	9.76546	8.76987	17.0176	5.43081	17.164	8.37318	3.82801	9.23902	13.3012	3.74917	11.9519	3.11095	2.47522	9.80135	12.6908	15.4534	9.71249	11.3502	11.3549	9.19841
arahy.Tifrunner.gnm1.ann1.693WQ9	AhFBX46	1.10372	0.604272	0.859894	1.4537	1.50156	1.80504	0.954142	1.32932	1.08364	2.91277	1.18287	18.0876	17.6322	31.5257	25.8518	0.834241	1.46383	6.2582	3.16749	1.6876	2.37026	11.8	8.4852	15.7546	1.22636	1.45491	9.5098	0.805347	4.39183	4.05268	19.9085	10.5696	45.2314	5.82741	8.8215	10.7105
arahy.Tifrunner.gnm1.ann1.ELS2X1	AhFBX47	0.914569	0.890845	0.907618	1.09913	0.971031	1.00105	1.48071	1.28748	1.39706	1.4851	1.6526	1.17612	1.9061	1.30752	1.67911	1.63576	1.54444	0.946106	0.947262	0.750962	1.48525	0.988322	1.05876	0.99492	1.61797	2.22614	1.3458	0.905024	1.29127	0.987658	2.09812	1.85236	1.95002	2.06528	1.85974	1.37982
arahy.Tifrunner.gnm1.ann1.U3PQ4N	AhFBX48	0.715792	1.39368	0.681255	0.736237	0.961433	0.405101	2.50938	1.63874	1.64958	0.389165	1.51284	0.301868	0.555782	0.879473	0.651729	2.35007	2.5978	0.711351	0.996584	0.452704	0.762759	1.26521	0.3421	0.710952	1.38355	0.506939	1.34087	1.12941	0.473571	0.591404	0.363348	1.62871	1.03026	1.79562	1.34618	1.12336
arahy.Tifrunner.gnm1.ann1.3J0CNY	AhFBX49	0.621359	0.582426	0.229625	0.066305	0.404515	0.269434	0.131501	0.201583	0.155207	0.129183	0.070609	0.21206	0.111345	0.081438	0.059365	0.581371	0.195799	0.114489	0.244233	0.249398	0.165562	0.762224	0.133188	0.169164	0.333488	0.094089	0.12238	0.065261	0.03109	0.068701	0.094823	0.182797	0.041997	0.077053	0.154837	0.18196
arahy.Tifrunner.gnm1.ann1.K2HCDK	AhFBX50	0.073242	0	0	0	0	0	0	0	0	0	0.021208	0.114993	0	0.107817	0.057687	0.120452	0.086047	0	0.059952	0.241292	0.10598	0.518166	0.454937	0.178164	0.110605	0.168451	0.244692	0.208006	0.042512	0.087789	0.118976	0.161025	0.067417	0.033433	0.133118	0.043433
arahy.Tifrunner.gnm1.ann1.9W7Z3M	AhFBX51	2.86979	3.35186	3.80132	3.42456	4.03163	3.58752	3.79393	4.90537	4.96598	2.90978	5.02402	5.32298	5.38846	4.93048	4.87348	3.38831	3.44875	3.99086	3.17099	4.4921	1.3006	3.48954	3.21689	6.76211	4.29666	5.42192	7.14229	3.69453	4.37426	4.6033	3.88455	3.83186	5.25258	4.26057	6.24694	7.08876
arahy.Tifrunner.gnm1.ann1.JKK1Y1	AhFBX52	0.830672	0.939175	0.910101	0.30834	0.2868	0.754098	0.551048	0.296998	0.323423	0.169407	0.252292	0.288602	0.100951	0.137125	0.081054	0.276596	0.274282	0.197444	0.745483	0.289897	0.843709	0.722913	0.100202	0.34533	0.242165	0.179631	0.137737	0.114187	0.140639	0.238081	0.261441	0.05392	0.089482	0.039874	0.161245	0.093448
arahy.Tifrunner.gnm1.ann1.8FUA72	AhFBX53	1.29177	1.7818	1.68911	0.895878	1.23316	0.996773	1.25188	0.961497	1.01218	0.688454	1.15929	1.04512	0.501664	0.835341	0.534086	1.40854	0.761901	0.418351	0.845408	0.913935	0.895977	1.1525	1.2218	0.711421	1.3784	0.437725	0.459944	1.04397	0.52327	0.822717	0.906257	0.859366	0.849142	0.745651	0.665102	0.612861
arahy.Tifrunner.gnm1.ann1.K4WWU7	AhFBX54	2.78529	4.93256	3.95898	2.18413	2.44362	2.77603	3.55519	2.90607	3.77704	3.86035	3.64304	3.07495	1.91175	2.15883	2.62182	2.5762	2.93473	2.76592	4.23785	2.57213	3.91356	2.75416	3.1875	1.84989	2.28148	3.39441	2.26814	2.83746	2.50955	3.66244	3.85715	4.92495	3.80238	3.04974	2.61249	3.11625
arahy.Tifrunner.gnm1.ann1.W71BFG	AhFBX55	7.64454	6.15292	9.60503	7.03207	7.13863	7.58997	11.4527	15.2102	15.7231	5.42485	9.22784	5.42859	7.34096	4.59697	6.65059	7.68504	7.89333	7.02527	5.16511	6.41911	5.36547	12.0836	11.4153	9.2851	20.065	13.2905	16.5149	9.41674	5.82349	7.5235	8.24913	6.99468	6.66585	6.04522	6.8533	6.24256
arahy.Tifrunner.gnm1.ann1.8GYA0C	AhFBX56	7.20057	5.96564	7.41647	5.02296	5.79392	6.82323	7.41323	8.91651	7.31844	6.01008	10.9878	8.05491	5.76473	4.9061	4.63631	4.56922	4.4949	5.6504	6.2438	7.21396	7.94811	5.90762	5.0925	6.13105	5.74437	6.29716	6.62777	6.24184	7.67898	7.72187	5.5872	4.39238	4.2641	4.071	3.8462	5.22586
arahy.Tifrunner.gnm1.ann1.FL9AGG	AhFBX57	12.7725	13.4898	12.7661	13.4539	13.497	13.3333	16.96	11.4526	16.2302	22.505	14.8551	14.9021	10.967	12.6533	11.67	13.4549	15.1093	16.6743	12.3841	8.57416	10.8187	11.8133	10.2612	7.39652	15.5046	12.1937	11.4621	10.6206	9.94725	13.2013	17.6426	17.5906	14.1552	15.2481	9.22476	7.94275
arahy.Tifrunner.gnm1.ann1.YU67T7	AhFBX58	0	0	0	0	0	0	0	0	0	0	0.021208	0.114993	0	0.107817	0.057687	0.120452	0.086047	0	0.059952	0.241292	0.10598	0.518166	0.454937	0.178164	0.110605	0.168451	0.244692	0.208006	0.042512	0.087789	0.118976	0.161025	0.067417	0.033433	0.133118	0.043433
arahy.Tifrunner.gnm1.ann1.ZT59C6	AhFBX59	1.14301	0.994805	1.34891	1.33291	1.37574	1.40394	1.05942	1.08062	0.810792	0.445878	0.798565	0.77679	0.548671	0.380751	0.458514	1.13258	1.22813	0.648714	1.45335	2.15471	1.20277	1.10499	0.725487	1.07988	1.20021	1.34348	0.834947	2.35709	0.421085	1.70286	0.623658	0.660406	0.502267	0.80725	0.73253	0.901167
arahy.Tifrunner.gnm1.ann1.LXV8AN	AhFBX60	0.725471	1.22955	1.31086	0.022547	0.537295	0.836062	1.0176	0.447334	1.25222	0.790133	0.810183	0.587718	0.847413	0.934746	0.555355	0.822793	1.00874	0.419919	0.041571	0.031023	0.022395	0	0	0	0	0	0	0	0	0	0	0	0	0	0	0
arahy.Tifrunner.gnm1.ann1.II1KZ3	AhFBX61	0.462876	0.309052	0.789269	0	0	0	0	0	0	0	0.021208	0.114993	0	0.107817	0.057687	0.120452	0.086047	0	0.059952	0.241292	0.10598	0.518166	0.454937	0.178164	0.110605	0.168451	0.244692	0.208006	0.042512	0.087789	0.118976	0.161025	0.067417	0.033433	0.133118	0.043433
arahy.Tifrunner.gnm1.ann1.LPT1V0	AhFBX62	0.011986	0.019574	0.050764	0.028797	0.027883	0.045712	0.003098	0	0	0	0.021208	0.114993	0	0.107817	0.057687	0.120452	0.086047	0	0.059952	0.241292	0.10598	0.518166	0.454937	0.178164	0.110605	0.168451	0.244692	0.208006	0.042512	0.087789	0.118976	0.161025	0.067417	0.033433	0.133118	0.043433
arahy.Tifrunner.gnm1.ann1.S178WR	AhFBX63	0.309621	0.827706	0.352077	0.14132	0.381055	0.41033	0.352345	0.26342	0.301305	0.176313	0.311262	0.162578	0.097112	0.122485	0.141926	0.232637	0.217953	0.044252	0.35517	0.145904	0.284807	0.235225	0.217119	0.343097	0.719206	0.080918	0.163098	0.405334	0.120249	0.280804	0.357099	0.385272	0.214221	0.099349	0.143897	0.136769
arahy.Tifrunner.gnm1.ann1.YA6NJH	AhFBX64	0.363927	0.336459	0.681069	1.03073	0.33092	0.52148	0.227247	0.125756	0.661534	1.97611	0.344209	1.45148	0.368283	0.266239	1.1963	1.15904	0.866026	0.777843	1.38743	0.434153	0.457166	1.07081	0.238544	0.914611	1.22049	1.44678	3.02923	0.980915	0.810656	0.447341	0.578062	1.33125	0.705043	0.956818	0.327153	0.227777
arahy.Tifrunner.gnm1.ann1.BNH673	AhFBX65	0.023071	0.021927	0.030074	0.008525	0.032911	0.01852	0.043832	0.02221	0	0	0.021208	0.114993	0	0.107817	0.057687	0.120452	0.086047	0	0.059952	0.241292	0.10598	0.518166	0.454937	0.178164	0.110605	0.168451	0.244692	0.208006	0.042512	0.087789	0.118976	0.161025	0.067417	0.033433	0.133118	0.043433
arahy.Tifrunner.gnm1.ann1.FJK5PX	AhFBX66	0.882012	0.70122	0.791571	0.000478	0.745327	0.592252	0.467999	0.371269	0.467479	0.543256	0.594576	0.621749	0.501179	0.226938	0.334101	0.453467	0.931291	0.272871	0	0	0	0	0	0	0	0	0	0	0	0	0	0	0	0	0	0
arahy.Tifrunner.gnm1.ann1.HZK6PM	AhFBX67	0.591767	0.588777	0.280561	0.067705	0.282791	0.441188	0.564623	0.316033	0.152549	0.232096	0.244149	0.33668	0.226987	0.260244	0.017952	0.085384	0.06147	0.07182	0.053119	0.020946	0	0	0	0	0	0	0	0	0	0	0	0	0	0	0	0
arahy.Tifrunner.gnm1.ann1.MAM16D	AhFBX68	0.161001	0.112559	0.206376	0.011351	0.097184	0.069253	0.028406	0.083733	0.106061	0.084417	0.109347	0.067863	0.090877	0.20556	0.08995	0.147398	0.062975	0.083203	0	0	0	0	0	0	0	0	0	0	0	0	0	0	0	0	0	0
arahy.Tifrunner.gnm1.ann1.4I2C1H	AhFBX69	0.70027	0.56026	0.549944	0.304586	0.586249	0.483572	0.474059	0.198874	0.658437	1.02831	0.32093	0.344347	0.437542	0.520653	0.516611	0.672981	0.48469	0.239805	0.69765	0.24548	0.542647	1.30872	0.577616	0.101894	0.251719	0.329983	0.311673	0.139834	0.245316	0.213793	0.320552	0.518768	0.280816	0.409019	0.266734	0.117909
arahy.Tifrunner.gnm1.ann1.M84CU1	AhFBX70	1.06413	1.54765	3.16572	0.953975	1.52393	1.40702	1.69591	0.863367	1.01489	1.03156	0.696348	1.16646	0.972598	1.04424	1.18703	1.04577	0.66631	0.762074	1.74123	0.648992	1.45208	0.677297	1.00213	1.17158	1.226	0.968412	0.57194	0.696686	0.340634	0.842807	0.308071	0.849038	0.731796	0.395594	0.49406	0.686182
arahy.Tifrunner.gnm1.ann1.68D2LB	AhFBX71	0.338957	1.0712	0.18943	0.101079	0.07978	0.363389	0	0	0	0	0.021208	0.114993	0	0.107817	0.057687	0.120452	0.086047	0	0.059952	0.241292	0.10598	0.518166	0.454937	0.178164	0.110605	0.168451	0.244692	0.208006	0.042512	0.087789	0.118976	0.161025	0.067417	0.033433	0.133118	0.043433
arahy.Tifrunner.gnm1.ann1.LNZY0A	AhFBX72	0.046275	0.290358	0.223221	0.050767	0.150439	0.191421	0.14159	0.100451	0.107208	0.03357	0.002948	0.000401	0.141058	0.018263	0	0	0	0	0.059952	0.241292	0.10598	0.518166	0.454937	0.178164	0.110605	0.168451	0.244692	0.208006	0.042512	0.087789	0.118976	0.161025	0.067417	0.033433	0.133118	0.043433
arahy.Tifrunner.gnm1.ann1.AEIW8D	AhFBX73	0	0	0	0	0	0	0	0	0	0	0.021208	0.114993	0	0.107817	0.057687	0.120452	0.086047	0	0.059952	0.241292	0.10598	0.518166	0.454937	0.178164	0.110605	0.168451	0.244692	0.208006	0.042512	0.087789	0.118976	0.161025	0.067417	0.033433	0.133118	0.043433
arahy.Tifrunner.gnm1.ann1.RIMI91	AhFBX74	0.021021	0	0	0	0	0	0	0	0	0	0.021208	0.114993	0	0.107817	0.057687	0.120452	0.086047	0	0.059952	0.241292	0.10598	0.518166	0.454937	0.178164	0.110605	0.168451	0.244692	0.208006	0.042512	0.087789	0.118976	0.161025	0.067417	0.033433	0.133118	0.043433
arahy.Tifrunner.gnm1.ann1.UIW2EQ	AhFBX75	3.3695	5.25896	4.46819	3.9967	3.84601	3.31772	3.9577	3.88768	3.87318	4.82164	5.70396	4.67938	5.27577	4.44097	4.62795	3.77624	4.5072	6.35956	4.40496	3.3075	4.83428	3.70424	4.52909	3.64066	4.38675	4.62021	4.30139	3.53345	4.05928	3.45926	4.75205	5.82493	5.2499	6.54566	5.6089	4.39016
arahy.Tifrunner.gnm1.ann1.DC671X	AhFBX76	0	0	0	0	0	0	0	0	0	0	0.021208	0.114993	0	0.107817	0.057687	0.120452	0.086047	0	0.059952	0.241292	0.10598	0.518166	0.454937	0.178164	0.110605	0.168451	0.244692	0.208006	0.042512	0.087789	0.118976	0.161025	0.067417	0.033433	0.133118	0.043433
arahy.Tifrunner.gnm1.ann1.YYE7NP	AhFBX77	4.25823	5.59514	5.97147	4.55539	4.11703	4.52112	5.39366	6.26814	7.9559	5.4426	6.87594	5.12981	6.36901	5.12558	6.46	4.43617	4.14729	4.10169	4.38398	3.90759	6.77664	5.03749	6.17422	7.56477	6.52937	5.53547	8.73138	4.29908	6.656	5.9752	6.92751	5.29918	6.10587	4.12898	7.31413	7.27058
arahy.Tifrunner.gnm1.ann1.DJE5AQ	AhFBX78	0.048874	0	0	0	0	0	0	0	0	0	0.021208	0.114993	0	0.107817	0.057687	0.120452	0.086047	0	0.059952	0.241292	0.10598	0.518166	0.454937	0.178164	0.110605	0.168451	0.244692	0.208006	0.042512	0.087789	0.118976	0.161025	0.067417	0.033433	0.133118	0.043433
arahy.Tifrunner.gnm1.ann1.3Z8CKB	AhFBX79	0.136076	0.075013	0.080571	0	0	0	0	0	0	0	0.021208	0.114993	0	0.107817	0.057687	0.120452	0.086047	0	0.059952	0.241292	0.10598	0.518166	0.454937	0.178164	0.110605	0.168451	0.244692	0.208006	0.042512	0.087789	0.118976	0.161025	0.067417	0.033433	0.133118	0.043433
arahy.Tifrunner.gnm1.ann1.5FA8WQ	AhFBX80	0	0	0	0	0	0	0	0	0	0	0.021208	0.114993	0	0.107817	0.057687	0.120452	0.086047	0	0.059952	0.241292	0.10598	0.518166	0.454937	0.178164	0.110605	0.168451	0.244692	0.208006	0.042512	0.087789	0.118976	0.161025	0.067417	0.033433	0.133118	0.043433
arahy.Tifrunner.gnm1.ann1.G4DFGN	AhFBX81	0	0	0	0	0	0	0	0	0	0	0.021208	0.114993	0	0.107817	0.057687	0.120452	0.086047	0	0.059952	0.241292	0.10598	0.518166	0.454937	0.178164	0.110605	0.168451	0.244692	0.208006	0.042512	0.087789	0.118976	0.161025	0.067417	0.033433	0.133118	0.043433
arahy.Tifrunner.gnm1.ann1.YXHH77	AhFBX82	4.94045	4.23838	4.60802	3.4532	3.55248	3.69106	2.82023	2.63527	2.73783	2.62355	2.32084	2.69468	2.06941	2.7827	2.70585	3.62245	3.35636	2.47688	4.15536	3.66493	4.56568	3.86814	2.34687	2.44152	3.71033	3.46761	2.31469	2.88386	2.92267	2.58132	3.1338	2.91767	2.69332	2.9994	2.73505	3.11486
arahy.Tifrunner.gnm1.ann1.SVZ6B5	AhFBX83	0.620964	0.541467	0.444013	0.486263	0.443977	0.278138	0.312004	0.476145	0.221334	0.493688	0.554607	1.09916	0.150005	0.558782	0.386435	0.81779	0.443601	0.278679	0.431406	0.332155	0.4377	0.383721	0.126579	0.457071	0.510274	0.170868	0.486027	0.35677	0.301203	0.365829	0.465427	0.586302	0.471768	0.380054	0.276855	0.140389
arahy.Tifrunner.gnm1.ann1.X1Z13X	AhFBX84	1.95846	1.00067	2.69855	2.21102	1.59816	1.33069	1.60854	1.17611	1.85774	0.640042	1.0114	0.55003	0.458498	0.816154	0.463993	1.98648	1.75338	0.469146	2.03111	1.81407	1.64232	2.27635	1.94315	1.22569	2.52644	2.86902	1.43478	1.89637	0.889665	1.26965	0.34999	0.826114	1.09244	1.57302	1.14626	0.779599
arahy.Tifrunner.gnm1.ann1.MZ50XC	AhFBX85	3.10921	2.69044	3.03902	1.3111	2.29573	2.16703	2.06881	1.42792	2.08809	1.64426	1.27888	1.23782	1.14393	0.956194	0.742405	1.79129	1.66185	0.859838	2.4524	1.95418	1.96281	3.66791	1.78743	1.14824	2.60666	2.128	1.38377	1.71032	1.39673	1.46023	1.42859	1.29575	1.18956	1.32557	1.18011	1.28846
arahy.Tifrunner.gnm1.ann1.CSTZ0U	AhFBX86	0.784166	0.140839	0.082723	0.012256	0.003153	0	0	0	0	0	0.021208	0.114993	0	0.107817	0.057687	0.120452	0.086047	0	0.059952	0.241292	0.10598	0.518166	0.454937	0.178164	0.110605	0.168451	0.244692	0.208006	0.042512	0.087789	0.118976	0.161025	0.067417	0.033433	0.133118	0.043433
arahy.Tifrunner.gnm1.ann1.PRFE0Z	AhFBX87	0.508056	0	0	0	0	0	0	0	0	0	0.021208	0.114993	0	0.107817	0.057687	0.120452	0.086047	0	0.059952	0.241292	0.10598	0.518166	0.454937	0.178164	0.110605	0.168451	0.244692	0.208006	0.042512	0.087789	0.118976	0.161025	0.067417	0.033433	0.133118	0.043433
arahy.Tifrunner.gnm1.ann1.XH3FAH	AhFBX88	0.237407	0.174969	0.001227	0	0	0	0	0	0	0	0.021208	0.114993	0	0.107817	0.057687	0.120452	0.086047	0	0.059952	0.241292	0.10598	0.518166	0.454937	0.178164	0.110605	0.168451	0.244692	0.208006	0.042512	0.087789	0.118976	0.161025	0.067417	0.033433	0.133118	0.043433
arahy.Tifrunner.gnm1.ann1.KU1CJZ	AhFBX89	0.062705	0.285314	0.121549	0.319803	0.187358	0.47638	0.465234	0.476113	0.37042	0.053873	0	0	0	0.107817	0.057687	0.120452	0.086047	0	0.059952	0.241292	0.10598	0.518166	0.454937	0.178164	0.110605	0.168451	0.244692	0.208006	0.042512	0.087789	0.118976	0.161025	0.067417	0.033433	0.133118	0.043433
arahy.Tifrunner.gnm1.ann1.NJ4UUV	AhFBX90	13.1034	15.5904	14.6454	8.65023	9.39585	10.4707	10.6286	7.51032	14.0843	15.1425	12.5944	17.1934	9.1748	9.71009	7.32236	6.11205	6.81757	9.55273	13.3524	11.8375	13.574	8.35236	11.3938	6.06348	12.7825	16.2524	11.9561	12.8079	9.20359	9.57315	12.5771	11.8096	9.38984	10.6049	8.96407	10.0689
arahy.Tifrunner.gnm1.ann1.CIN5QE	AhFBX91	1.05336	1.23599	0.809273	1.72847	1.52857	1.65035	0.498005	0.530448	0.544585	3.45486	0.84051	15.1575	6.66318	16.2566	17.8831	0.857435	1.95164	5.30455	2.0641	1.17035	2.15872	10.9338	9.15742	14.2029	1.01389	1.63898	4.90932	0.537383	2.15354	2.84784	15.9576	4.12343	30.9905	4.78767	10.6039	12.4147
arahy.Tifrunner.gnm1.ann1.RJB6DE	AhFBX92	0.745044	1.82369	1.06523	1.36671	1.44042	1.00055	1.41959	1.28165	1.6597	1.55786	1.40091	1.7253	2.10457	1.20568	1.39305	1.48329	1.46867	0.991119	1.58152	0.558596	1.32536	0.955377	0.728417	1.15412	1.25422	1.35289	1.38739	1.17578	1.56168	1.0417	1.87492	2.17977	1.25578	1.42731	1.40751	1.75673
arahy.Tifrunner.gnm1.ann1.9X7FSY	AhFBX93	1.58384	1.45466	1.26616	1.13847	1.20921	1.20686	1.39223	1.22626	1.23545	1.04263	1.37317	1.39539	1.0914	1.09838	1.0409	1.0787	0.875754	1.15418	1.28711	1.51188	1.6548	1.45808	0.956196	1.07139	1.92008	1.31216	0.977693	1.56533	1.15308	1.93911	2.02797	1.36407	1.66255	1.27863	1.61758	1.42825
arahy.Tifrunner.gnm1.ann1.W5GG00	AhFBX94	1.63065	1.22802	0.818352	2.26543	1.15815	1.25278	1.74047	0.99495	0.780288	1.25577	3.47668	1.5631	3.33199	0.13434	5.76922	0.44869	1.17479	5.04953	1.09583	2.54179	0.648165	2.29389	2.37493	4.49624	0.28713	0.668425	2.67355	0.795129	5.50432	2.65548	0.846153	1.02195	4.43316	1.07317	1.58237	5.47057
arahy.Tifrunner.gnm1.ann1.ZE2WHA	AhFBX95	1.15952	1.35309	0.733069	1.244	1.02012	1.2653	1.45235	1.04657	1.1207	1.36644	1.0822	1.12777	1.73517	1.3361	1.84401	1.19646	1.60425	1.20624	1.46133	0.957934	2.16179	1.93668	0.965027	1.24046	2.02395	1.47459	1.34612	1.77083	1.31163	1.22496	1.61028	1.64076	1.27107	1.66234	1.96583	1.26393

## Sheet: S10
Genes	DAP	JH5			M130
AhFBX8	5	13.7533	15.2222	14.443	13.9316	9.54251	12.1712
	10	15.7092	16.0721	14.4575	14.5551	11.5643	8.90827
	15	18.8694	14.1104	18.8933	16.5745	14.8789	13.4886
	20	22.233	18.1578	13.6909	12.9803	13.6946	15.8711
	25	13.7549	14.2697	11.9269	16.3927	19.4235	14.4065
	30	15.7817	15.0269	15.0212	16.6459	10.0806	10.4978
AhFBX31	5	11.7083	14.9567	16.8841	12.34	9.30485	13.9632
	10	8.21237	11.0051	10.2494	11.8638	8.27754	9.57747
	15	13.8306	14.5051	16.9525	15.3692	15.47	18.7836
	20	15.7224	17.4664	18.0807	10.389	14.4576	14.9622
	25	14.4355	15.1527	13.6675	15.6419	14.9775	15.3615
	30	10.9123	9.20755	10.2075	10.7379	9.07334	8.73061
AhFBX40	5	6.54621	6.86467	6.05226	5.41803	4.54144	6.51454
	10	4.46414	4.5986	5.21832	6.30612	3.23125	2.69493
	15	4.70512	4.74426	4.67225	5.99557	3.82634	2.90822
	20	4.42407	3.90841	4.01512	4.34758	3.84183	3.69616
	25	2.96191	2.82706	3.04521	3.56313	3.82427	3.74523
	30	3.93568	3.97559	3.11175	3.10724	2.41424	2.84179
AhFBX45	5	16.0501	10.8438	16.4088	17.0176	5.43081	17.164
	10	2.87761	8.09267	9.99403	8.37318	3.82801	9.23902
	15	10.7904	10.6205	10.0809	13.3012	3.74917	11.9519
	20	12.5053	9.63763	12.3701	3.11095	2.47522	9.80135
	25	11.9117	11.3383	10.6984	12.6908	15.4534	9.71249
	30	8.74668	9.76546	8.76987	11.3502	11.3549	9.19841
AhFBX46	5	1.10372	0.604272	0.859894	3.16749	1.6876	2.37026
	10	1.4537	1.50156	1.80504	11.8	8.4852	15.7546
	15	0.954142	1.32932	1.08364	1.22636	1.45491	9.5098
	20	2.91277	1.18287	18.0876	0.805347	4.39183	4.05268
	25	17.6322	31.5257	25.8518	19.9085	10.5696	45.2314
	30	0.834241	1.46383	6.2582	5.82741	8.8215	10.7105
AhFBX55	5	7.64454	6.15292	9.60503	5.16511	6.41911	5.36547
	10	7.03207	7.13863	7.58997	12.0836	11.4153	9.2851
	15	11.4527	15.2102	15.7231	20.065	13.2905	16.5149
	20	5.42485	9.22784	5.42859	9.41674	5.82349	7.5235
	25	7.34096	4.59697	6.65059	8.24913	6.99468	6.66585
	30	7.68504	7.89333	7.02527	6.04522	6.8533	6.24256
AhFBX57	5	12.7725	13.4898	12.7661	12.3841	8.57416	10.8187
	10	13.4539	13.497	13.3333	11.8133	10.2612	7.39652
	15	16.96	11.4526	16.2302	15.5046	12.1937	11.4621
	20	22.505	14.8551	14.9021	10.6206	9.94725	13.2013
	25	10.967	12.6533	11.67	17.6426	17.5906	14.1552
	30	13.4549	15.1093	16.6743	15.2481	9.22476	7.94275
AhFBX90	5	13.1034	15.5904	14.6454	13.3524	11.8375	13.574
	10	8.65023	9.39585	10.4707	8.35236	11.3938	6.06348
	15	10.6286	7.51032	14.0843	12.7825	16.2524	11.9561
	20	15.1425	12.5944	17.1934	12.8079	9.20359	9.57315
	25	9.1748	9.71009	7.32236	12.5771	11.8096	9.38984
	30	6.11205	6.81757	9.55273	10.6049	8.96407	10.0689
AhFBX91	5	1.05336	1.23599	0.809273	2.0641	1.17035	2.15872
	10	1.72847	1.52857	1.65035	10.9338	9.15742	14.2029
	15	0.498005	0.530448	0.544585	1.01389	1.63898	4.90932
	20	3.45486	0.84051	15.1575	0.537383	2.15354	2.84784
	25	6.66318	16.2566	17.8831	15.9576	4.12343	30.9905
	30	0.857435	1.95164	5.30455	4.78767	10.6039	12.4147
